# Supplementary material
Source: MDPI journal article supplement (https://www.mdpi.com/2076-3417/11/15/6997)
Supplement: s1 [file s1]

Archive with 7 entries (7 files):
- Fig. S1.tif
- Fig. S2.tif
- Table S1.pdf
- Table S2.xlsx
- Table S3.xlsx
- Table S4.xlsx
- Table S5.xlsx
