# Supplementary material
Source: MDPI journal article supplement (https://www.mdpi.com/2076-3417/11/15/6997)
Supplement: s1 [file s1]

**Table S1.** Summary of color difference of pileus under blue light or dark (no light).

| <b>Light sources</b> | <b>Lightness</b> | <b>Redness</b> | <b>Yellowness</b> |
|----------------------|------------------|----------------|-------------------|
| Blue                 | 31.1             | 14.7           | 18.5              |
| Dark (no light)      | 47.7             | 13.9           | 26.8              |

Redness is calculated as the difference between red (+) and green (–).

Yellowness is calculated as the difference between yellow (+) and blue (–).
