# Supplementary material
Source: MDPI journal article supplement (https://www.mdpi.com/2076-3417/11/15/6997)
Supplement: s1 [file s1 › Table S2.xlsx]

## Sheet: Sheet1
Table S2. The list of DEG primers with 2-fold change under blue light for qRT-PCR. Constructed gene specific primers are listed as forward (F) and reverse (R) primers used in qRT-PCR analysis.
Gene symbol	Sense (5´→3´)	Antisense (5´→3´)
LE01Gene05969	CGACATGTCTCAGCTTGGAA	GTGTCCTCTCCTCCCATTGA
LE01Gene07732	GATTGGAGGCGATGGAGATA	AGCTGACGCAAGGAAAATGT
LE01Gene01730	CCGACTGTCCAAGGTTTGAT	AGCTTTGTCCAAATGGCATC
LE01Gene08830	TCTCGGCTCAACAACAACAG	CCGGATTGGTAGGTTTCTGA
LE01Gene09749	AATTTCTGAGCCCCACCTTT	CTGGGTGTTTTGGCTTTGAT
LE01Gene09820	ATCTGCCTATCGCCAATGTC	ATGAATTCCGAGACGCATTC
LE01Gene11531	GAACTGCAACGATCAAGCAA	TGCATGAGCGCTTTAATCAC
LE01Gene11538	TCAGTCAAGACACCGACAGC	GAATCCGGCTGTTGAGGATA
LE01Gene13269	CCCAACGAATTCACAGAGGT	GAATGTAAGGAGGCGATGGA
LE01Gene03510	CTTCATCGAGGCTTCTTTGC	ATCAGGCTTACGAAGGAGCA
LE01Gene08925	GCTTGCACCAACTGTCAGAA	CGTTCCTTTCGCTGAGAATC
LE01Gene06170	GACTCAAGGCCAACAGAAGC	AATCGTCGACCTCCCTACCT
LE01Gene06300	ATTACGGTGGATTTGCTTCG	AATGAAACTGGGCATTCGAG
LE01Gene07491	GCAAAGGCGGATATCCATAA	GAAAGACGCGCTTTTATTGC
LE01Gene08723	CATCAACGCGACTACCTCAA	ACTTGCTGCGACCGTTATCT
LE01Gene04829	TCTTGCACTGGCACTACCTG	TTCCTGGGCCATAGAAAGTG
LE01Gene03338	GACCAGGGTGACTCATTCGT	AGCTTGCACTTTGACCGTCT
LE01Gene00748	ATAGTGATTTGGCCGGAGTG	AGTGCTCTTTCGGGATGAGA
LE01Gene03808	TCCAGCACGTTGACTCTGTC	TAAACATATCCCGCCAAAGC
LE01Gene07497	ATATCGAACGCCCAACAAAG	ATAGCGACCTTGGAGCAGAA
LE01Gene00046	GGGAAAATTCAACCCAGGAT	AAAAGTGTGCCCAATCCATC
LE01Gene00946	TTTCGTTCTGAGTGCGATTG	TCCCGACGTACATGATGAAA
18S rbs gene	GCGCTACACTGACAGAGCCA	GCGGTGTGTACAAAGGGCAG

## Sheet: Sheet2
Table
	Gene symbol	Sense (5´→3´)	Antisense (5´→3´)
DEG1	LE01Gene05969	CGACATGTCTCAGCTTGGAA	GTGTCCTCTCCTCCCATTGA
DEG2	LE01Gene07732	GATTGGAGGCGATGGAGATA	AGCTGACGCAAGGAAAATGT
DEG3	LE01Gene01730	CCGACTGTCCAAGGTTTGAT	AGCTTTGTCCAAATGGCATC
DEG4	LE01Gene08830	TCTCGGCTCAACAACAACAG	CCGGATTGGTAGGTTTCTGA
DEG5	LE01Gene09749	AATTTCTGAGCCCCACCTTT	CTGGGTGTTTTGGCTTTGAT
DEG6	LE01Gene09820	ATCTGCCTATCGCCAATGTC	ATGAATTCCGAGACGCATTC
DEG8	LE01Gene11531	GAACTGCAACGATCAAGCAA	TGCATGAGCGCTTTAATCAC
DEG9	LE01Gene11538	TCAGTCAAGACACCGACAGC	GAATCCGGCTGTTGAGGATA
DEG10	LE01Gene13269	CCCAACGAATTCACAGAGGT	GAATGTAAGGAGGCGATGGA
DEG13	LE01Gene03510	CTTCATCGAGGCTTCTTTGC	ATCAGGCTTACGAAGGAGCA
DEG14	LE01Gene08925	GCTTGCACCAACTGTCAGAA	CGTTCCTTTCGCTGAGAATC
DEG15	LE01Gene06170	GACTCAAGGCCAACAGAAGC	AATCGTCGACCTCCCTACCT
DEG16	LE01Gene06300	ATTACGGTGGATTTGCTTCG	AATGAAACTGGGCATTCGAG
DEG17	LE01Gene07491	GCAAAGGCGGATATCCATAA	GAAAGACGCGCTTTTATTGC
DEG19	LE01Gene08723	CATCAACGCGACTACCTCAA	ACTTGCTGCGACCGTTATCT
DEG22	LE01Gene04829	TCTTGCACTGGCACTACCTG	TTCCTGGGCCATAGAAAGTG
DEG23	LE01Gene03338	GACCAGGGTGACTCATTCGT	AGCTTGCACTTTGACCGTCT
DEG26	LE01Gene00748	ATAGTGATTTGGCCGGAGTG	AGTGCTCTTTCGGGATGAGA
DEG29	LE01Gene03808	TCCAGCACGTTGACTCTGTC	TAAACATATCCCGCCAAAGC
DEG32	LE01Gene07497	ATATCGAACGCCCAACAAAG	ATAGCGACCTTGGAGCAGAA
DEG33	LE01Gene00046	GGGAAAATTCAACCCAGGAT	AAAAGTGTGCCCAATCCATC
DEG34	LE01Gene00946	TTTCGTTCTGAGTGCGATTG	TCCCGACGTACATGATGAAA
18S rbs	Housekeepin	GCGCTACACTGACAGAGCCA	GCGGTGTGTACAAAGGGCAG
