# Supplementary material
Source: MDPI journal article supplement (https://www.mdpi.com/2076-3417/11/15/6997)
Supplement: s1 [file s1 › Table S3.xlsx]

## Sheet: up_annotation
Table S2. The list and annotation of up- and down-regulated genes with 2-fold change under blue light condition
SeqName	Description	Length	e-Value	similarity	logFC	logCPM	LR	PValue
LE01Gene05688	hypothetical protein LENED_012112	198	4.01e-135	98.48	4.74056	3.69474	5.96065	0.0146287
LE01Gene05766	hypothetical protein LENED_003727	239	0	65.5	4.64697	3.31034	4.39217	0.0361043
LE01Gene05800	amidohydrolase	470	0	78.7	4.74118	3.70981	6.00446	0.0142698
LE01Gene05920	---NA---	241			4.6475	3.32987	4.43354	0.0352394
LE01Gene05969	predicted protein	927	0	61.98	4.82834	3.99706	8.0798	0.00447614
LE01Gene05972	hypothetical protein GYMLUDRAFT_33643	237	6.85e-103	65.8	4.98936	2.47771	5.14074	0.0233706
LE01Gene06004	s-adenosylmethionine-dependent methyltransferase	430	0	66.58	4.6475	3.32987	4.43354	0.0352394
LE01Gene06071	glycoside hydrolase family 17 protein	447	0	75.45	4.74092	3.70344	5.98591	0.0144206
LE01Gene06081	predicted protein	311	0	75.39	4.64697	3.31034	4.39217	0.0361043
LE01Gene06091	putative cyclase	387	4.24e-121	64.9	4.82957	4.07894	4.40675	0.0357971
LE01Gene03133	MFS general substrate transporter	506	0	84.38	5.32842	3.3173	11.9276	0.000553084
LE01Gene06153	predicted protein	254	1.26e-135	69.63	4.74092	3.70344	5.98591	0.0144206
LE01Gene06170	glycoside hydrolase family 3 protein	751	0	85.84	5.06348	2.6883	6.37236	0.0115911
LE01Gene00973	hypothetical protein LENED_009573	488	6.14e-123	85.25	5.38856	5.32392	19.8216	8.5e-06
LE01Gene00974	hypothetical protein LENED_009572	80	1.67e-52	79.72	4.82799	3.99131	7.7254	0.00544494
LE01Gene00986	hypothetical protein LENED_009557	228	1.63e-105	76.48	5.32781	3.31718	12.0867	0.000507824
LE01Gene00999	family A1 protease	402	0	75.59	4.91092	4.23938	9.04615	0.00263249
LE01Gene01002	ABC1-domain-containing protein	613	0	76.94	5.87377	2.07561	10.9249	0.00094881
LE01Gene01028	UAA transporter	398	0	68.31	4.74066	3.69706	5.96743	0.0145725
LE01Gene01065	predicted protein	432	0	64.73	4.98919	2.47293	4.6913	0.0303158
LE01Gene01102	Mitochondrial import inner membrane translocase subunit TIM14	102	8e-56	87.93	5.13467	4.80321	13.5123	0.000237002
LE01Gene01131	hypothetical protein LENED_012427	493	0	69.12	4.9119	4.26706	7.71149	0.00548704
LE01Gene01209	phosphatidylserine decarboxylase 1	536	0	81.41	5.13479	2.87376	7.78526	0.00526743
LE01Gene01262	predicted protein	211	1.47e-128	80.74	4.74066	3.69706	5.96743	0.0145725
LE01Gene01287	predicted protein	637	0	76.31	5.32734	2.41312	7.71935	0.00546321
LE01Gene06300	glycoside hydrolase family 1 protein	648	0	80.94	4.64678	3.30327	4.37714	0.0364241
LE01Gene06404	wsc domain	395	0	72.8	4.82879	4.00698	6.90967	0.0085731
LE01Gene06405	alpha-ketoglutarate-dependent taurine dioxygenase	383	0	74.78	5.26554	2.26628	6.4849	0.0108795
LE01Gene06409	choline ethanolaminephosphotransferase	149	1.52e-51	69.83	4.8286	3.99713	8.08009	0.00447543
LE01Gene06441	cytochrome p450	506	0	73.5	4.64723	3.3201	4.41279	0.0356704
LE01Gene06454	predicted protein	175	9.83e-123	62.76	4.74092	3.70344	5.98591	0.0144206
LE01Gene06477	hypothetical protein LENED_002283	288	3.41e-165	79.9	4.91078	2.22977	3.85702	0.0495382
LE01Gene03210	predicted protein	1230	0	63.04	5.32708	2.41312	7.71933	0.00546327
LE01Gene06553	Abhydrolase domain-containing protein mpaH	350	0	74.02	4.98936	2.47771	5.14074	0.0233706
LE01Gene00066	dicarboxylic acid transporter	294	0	83.18	4.74056	3.69474	5.96065	0.0146287
LE01Gene03218	RNA-binding domain-containing protein	423	0	70.73	4.82844	3.99709	8.07991	0.00447587
LE01Gene06665	transmembrane protein, putative	370	0	60.42	4.64697	3.31034	4.39217	0.0361043
LE01Gene06688	small ubiquitin-like modifier	191	1.83e-43	68.32	4.91157	4.25713	6.53756	0.010562
LE01Gene06725	predicted protein	449	0	81.59	4.74118	3.70981	6.00446	0.0142698
LE01Gene06727	OPT oligopeptide transporter	757	0	84.66	4.98971	2.47774	5.14085	0.0233692
LE01Gene06735	hypothetical protein LENED_008284	205	1.98e-40	100	5.20193	4.95111	16.1383	5.89e-05
LE01Gene03234	uhrf1 protein	299	0	77.59	4.64714	3.31655	4.40522	0.0358291
LE01Gene06778	structural maintenance of chromosome protein 3	1225	0	86.49	4.64759	3.33342	4.44117	0.0350822
LE01Gene06779	ATP phosphoribosyltransferase	302	0	90.38	4.64697	3.31034	4.39217	0.0361043
LE01Gene03238	flavin-containing monooxygenase	605	0	73.13	4.64678	3.30327	4.37714	0.0364241
LE01Gene03240	WD40 repeat-like protein	734	0	49.72	5.60288	2.98244	14.3001	0.000155859
LE01Gene06944	hypothetical protein LENED_012759	298	3.68e-51	100	4.74066	3.69706	5.96743	0.0145725
LE01Gene06960	hypothetical protein GYMLUDRAFT_38511	255	5.85e-17	47.28	5.20152	2.1028	5.29058	0.0214411
LE01Gene06998	DUF1768-domain-containing protein	602	0	62.13	4.8287	3.99716	8.0802	0.00447516
LE01Gene07035	histidinol phosphate phosphatase H	309	1.12e-172	78.45	4.64707	3.31388	4.39971	0.035945
LE01Gene00069	P-loop containing nucleoside triphosphate hydrolase protein	570	0	83.16	4.91147	4.24503	9.69954	0.00184314
LE01Gene07115	hypothetical protein LENED_003204	660	7.65e-139	70.59	4.64733	3.32364	4.42038	0.0355122
LE01Gene07212	monooxygenase	566	0	69.22	4.74082	3.70111	5.97911	0.0144763
LE01Gene07224	predicted protein	1103	0	68.05	5.38636	2.5398	8.32116	0.0039186
LE01Gene07244	RNA polymerase	158	6.73e-113	89.24	4.8285	3.99717	7.32697	0.00679275
LE01Gene07267	Photosystem I P700 chlorophyll a apoprotein A2	472	2.75e-178	57.75	4.64723	3.3201	4.41279	0.0356704
LE01Gene11848	predicted protein	177	6.75e-121	68.06	4.64785	3.34322	4.46209	0.034655
LE01Gene07348	Pre-rRNA-processing protein ESF2	305	0	83.97	4.64733	3.32364	4.42038	0.0355122
LE01Gene07352	60S ribosomal protein L2/L8	254	0	97.95	5.0642	4.64551	9.5538	0.00199536
LE01Gene07380	hypothetical protein HYDPIDRAFT_32566	296	1.21e-15	54.2	4.64678	3.30327	4.37714	0.0364241
LE01Gene01349	vacuolar assembly protein DID2	222	1.93e-146	95.97	5.65006	2.47709	9.59422	0.00195191
LE01Gene01356	hypothetical protein GYMLUDRAFT_236522	336	8.66e-99	49.73	5.44281	2.04667	6.77983	0.00921937
LE01Gene01386	predicted protein	355	1.63e-141	52.62	4.74056	3.69474	5.96065	0.0146287
LE01Gene01394	predicted protein	454	0	75.73	5.20082	2.10279	5.29058	0.0214411
LE01Gene01399	predicted protein	959	0	48.11	4.98955	2.47598	4.10989	0.0426331
LE01Gene01433	alpha/beta-hydrolase	894	0	73.31	4.6475	3.32987	4.43354	0.0352394
LE01Gene01504	tRNA pseudouridine synthase D	861	0	76.5	4.64723	3.3201	4.41279	0.0356704
LE01Gene01561	MFS general substrate transporter	499	0	69.2	4.64733	3.32364	4.42038	0.0355122
LE01Gene01611	px domain-containing protein	1057	0	77.79	4.74066	3.69706	5.96743	0.0145725
LE01Gene11891	l-aminoadipate-semialdehyde dehydrogenase	1050	0	79.75	4.98971	2.47774	5.14085	0.0233692
LE01Gene01647	Yos1-like protein	92	3.27e-54	83.39	5.06443	4.64265	12.5992	0.000385903
LE01Gene07431	---NA---	325			4.64697	3.31034	4.39217	0.0361043
LE01Gene07480	hypothetical protein GYMLUDRAFT_39929	129	4.15e-26	70.07	5.83191	3.35022	13.3099	0.000264002
LE01Gene07481	hypothetical protein LENED_004711	193	4.28e-68	58.56	4.82808	3.99105	7.62198	0.0057661
LE01Gene07491	glycoside hydrolase family 3 protein	1286	0	82.49	6.33309	2.84881	27.0148	2.02e-07
LE01Gene07495	mannitol-1-phosphate dehydrogenase	361	0	77.1	4.82825	3.99704	8.07969	0.00447641
LE01Gene07497	hypothetical protein LENED_004694	385	0	71.46	5.69808	2.57389	12.8388	0.0003395
LE01Gene07550	complexed with cdc5 protein cwf19	766	0	68.74	4.64759	3.33342	4.44117	0.0350822
LE01Gene07607	predicted protein	1145	0	75.64	4.91138	4.24501	9.69947	0.00184321
LE01Gene07648	---NA---	344			4.64723	3.3201	4.41279	0.0356704
LE01Gene07651	predicted protein	95	2.64e-38	69.13	4.82799	3.98417	7.2208	0.00720637
LE01Gene07694	S-adenosyl-L-methionine-dependent methyltransferase	337	0	90.4	4.91147	4.24503	9.69954	0.00184314
LE01Gene07699	NAD(P)-binding protein	294	6.22e-159	71.53	4.64678	3.30327	4.37714	0.0364241
LE01Gene07732	predicted protein	600	0	71.41	4.91104	2.22981	3.85715	0.0495344
LE01Gene07809	3-hydroxyacyl-CoA dehydrogenase	289	0	69.59	4.91164	4.24505	9.69966	0.00184302
LE01Gene07906	alpha beta-hydrolase	405	0	65.1	4.74082	3.70111	5.97911	0.0144763
LE01Gene07911	cyclohexanone monooxygenase	540	0	76.22	4.64688	3.30681	4.38465	0.036264
LE01Gene07950	Aldo/keto reductase	323	0	76.21	4.64759	3.33342	4.44117	0.0350822
LE01Gene07952	predicted protein	1157	0	70.23	5.0631	4.60393	8.57587	0.00340646
LE01Gene08141	hypothetical protein LENED_002226	329	2e-59	58.81	4.91088	2.22979	3.85707	0.0495368
LE01Gene08267	peptidase M18, aminopeptidase I	468	0	83.74	4.64759	3.33342	4.44117	0.0350822
LE01Gene08268	WD-repeat-containing protein	899	0	86.74	4.98936	2.47771	5.14074	0.0233706
LE01Gene08281	ribonuclease III	1444	0	60.24	4.64785	3.34322	4.46209	0.034655
LE01Gene08330	laccase 1	537	0	82.24	4.64733	3.32364	4.42038	0.0355122
LE01Gene08333	NAD(P)-binding protein	302	1.13e-169	75.59	4.74066	3.69706	5.96743	0.0145725
LE01Gene08356	flavonol synthase/flavanone 3-hydroxylase	98	1.27e-50	81.59	4.74092	3.70344	5.98591	0.0144206
LE01Gene08367	predicted protein	633	0	49.05	5.06322	2.6883	6.40971	0.0113498
LE01Gene08370	hypothetical protein LENED_010802	229	1.32e-34	73.58	4.64678	3.30327	4.37714	0.0364241
LE01Gene08392	predicted protein	324	0	67.8	4.91114	2.22982	3.8572	0.049533
LE01Gene08398	NCS1 nucleoside transporter family	542	0	87.26	4.74082	3.70111	5.97911	0.0144763
LE01Gene01713	---NA---	111			4.64697	3.31034	4.39217	0.0361043
LE01Gene01730	Nitrogen assimilation transcription factor nirA	877	0	55.23	4.64733	3.32364	4.42038	0.0355122
LE01Gene01742	hypothetical protein LENED_003425	246	2.31e-178	76.05	5.9571	6.24301	35.9378	2.04e-09
LE01Gene01778	predicted protein	365	0	75.42	5.55191	2.28038	7.56142	0.00596311
LE01Gene01790	g1 s regulator	566	0	62.04	4.64688	3.30681	4.38465	0.036264
LE01Gene01791	autophagy protein 5	366	0	84.71	4.91069	2.22976	3.85697	0.0495397
LE01Gene01825	purine nucleotide binding protein	993	0	79.56	5.55088	2.28114	9.11902	0.00252966
LE01Gene01857	MFS general substrate transporter	490	0	78.91	4.64759	3.33342	4.44117	0.0350822
LE01Gene01871	predicted protein	662	0	54.37	4.64733	3.32364	4.42038	0.0355122
LE01Gene01889	DNA/RNA polymerase	611	0	72.27	4.91114	2.22982	3.8572	0.049533
LE01Gene12023	capsule structure designer protein	579	0	65.06	4.64759	3.33342	4.44117	0.0350822
LE01Gene01939	endoplasmic oxidoreductin-1	537	0	80.56	4.64733	3.32364	4.42038	0.0355122
LE01Gene02033	NADH-ubiquinone oxidoreductase assembly factor N7BML	210	1.92e-150	61.84	4.98874	2.46651	4.64533	0.0311381
LE01Gene12031	NAD(P)-binding protein	342	0	78.07	4.74056	3.69474	5.96065	0.0146287
LE01Gene08481	erg4 erg24 ergosterol biosynthesis-like protein	267	0	60.58	4.98927	4.43374	6.58929	0.0102594
LE01Gene08482	erg4 erg24 ergosterol biosynthesis-like protein	270	3.74e-174	64.41	4.74056	3.69474	5.96065	0.0146287
LE01Gene08485	DUF866-domain-containing protein	160	1.55e-116	83.73	4.98997	2.4845	4.60047	0.0319632
LE01Gene08504	hypothetical protein LENED_004171	310	0	70.24	4.74118	3.70981	6.00446	0.0142698
LE01Gene08526	ATP dependent DNA helicase	830	0	83.86	4.74128	3.71214	6.01128	0.0142147
LE01Gene08535	NAD-P-binding protein	223	8.21e-161	71.59	4.64759	3.33342	4.44117	0.0350822
LE01Gene08542	predicted protein	419	0	80.81	5.32814	5.20645	19.4087	1.06e-05
LE01Gene08556	Las1-domain-containing protein	471	0	69.19	4.64723	3.3201	4.41279	0.0356704
LE01Gene08684	predicted protein	587	0	76.19	4.82834	3.99706	8.0798	0.00447614
LE01Gene08697	MFS general substrate transporter	556	0	73.88	4.74021	3.68605	5.93549	0.0148389
LE01Gene08723	l-ascorbate oxidase	563	0	73.91	4.74102	3.70576	5.99272	0.014365
LE01Gene08741	hypothetical protein GYMLUDRAFT_47097	342	5.75e-43	54.8	4.74102	3.70576	5.99272	0.014365
LE01Gene08754	puf family rna-binding protein	720	0	68.52	5.13408	2.87264	7.73086	0.00542849
LE01Gene08764	hypothetical protein GYMLUDRAFT_47140	80	9.96e-45	77.63	4.64723	3.3201	4.41279	0.0356704
LE01Gene08768	glycosyltransferase family 49 protein	705	0	57.23	4.91128	4.245	9.6994	0.00184328
LE01Gene08772	hypothetical protein LENED_010357	233	1.83e-128	93.61	4.74118	3.70981	6.00446	0.0142698
LE01Gene08782	alpha/beta-hydrolase	326	1.98e-157	66.59	4.82886	4.01869	5.64756	0.0174797
LE01Gene08815	replication factor A protein 3	107	2.92e-58	71.96	4.74056	3.69474	5.96065	0.0146287
LE01Gene08830	TBP-domain-containing protein	315	0	82.38	4.7403	3.68837	5.94224	0.0147822
LE01Gene08861	predicted protein	301	0	77.25	5.91628	2.95916	19.4195	1.05e-05
LE01Gene08918	DNA-directed RNA polymerase III subunit rpc4	273	5.49e-161	69.21	4.91104	2.22981	3.85715	0.0495344
LE01Gene08975	amino acid permease-like protein	549	0	84.16	5.65034	2.01502	8.28886	0.0039889
LE01Gene09013	FMN-linked oxidoreductase	361	0	79.85	4.9896	4.45648	11.3193	0.000767064
LE01Gene09035	predicted protein	374	0	65.04	4.7403	3.68837	5.94224	0.0147822
LE01Gene09045	Phosphotransferase family	305	3.33e-77	53.73	4.8285	3.9972	7.15925	0.00745786
LE01Gene09059	heterotrimeric G-protein alpha subunit, GPA1-like protein	354	0	96.88	4.74056	3.69474	5.96065	0.0146287
LE01Gene09139	Histone acetyltransferase type B subunit 2	464	0	88.5	4.6475	3.32987	4.43354	0.0352394
LE01Gene02081	aaa atpase	1455	0	68.32	4.98919	2.47296	4.69447	0.0302599
LE01Gene02106	predicted protein	314	1.93e-144	56.02	5.38713	2.54636	8.98678	0.00271939
LE01Gene02113	60S ribosomal protein L33	106	3.3e-72	97.31	5.95479	2.22498	13.2259	0.000276104
LE01Gene02114	hypothetical protein LENED_002086	452	0	60.23	4.64733	3.32364	4.42038	0.0355122
LE01Gene02261	glycosyltransferase family 1 protein	282	2.97e-169	71.46	4.82825	3.99704	8.07969	0.00447641
LE01Gene02262	predicted protein	420	0	65.28	5.60186	2.97222	12.2784	0.000458238
LE01Gene02291	conserved protein (fungal and plant)	134	4.17e-97	78.39	4.74092	3.70344	5.98591	0.0144206
LE01Gene09280	PigN-domain-containing protein	999	0	67.03	4.64759	3.33342	4.44117	0.0350822
LE01Gene09343	ubiquitin-conjugating enzyme 9	171	1.65e-112	88.8	4.98981	2.48252	4.41938	0.0355329
LE01Gene09365	mitochondrial nad transporter	203	3.58e-148	93.09	4.74092	3.70344	5.98591	0.0144206
LE01Gene09422	hypothetical protein LENED_002164	304	0	99.67	4.64678	3.30327	4.37714	0.0364241
LE01Gene09425	GMC oxidoreductase	520	0	78.34	4.7403	3.68837	5.94224	0.0147822
LE01Gene09496	4-oxalocrotonate tautomerase	148	1.43e-108	71.98	5.20096	3.0371	9.23547	0.00237372
LE01Gene09554	predicted protein	393	0	65.88	5.13441	4.80171	13.8337	0.000199723
LE01Gene09555	CAF1-domain-containing protein	340	0	83.03	6.75517	2.71252	17.8996	2.33e-05
LE01Gene12192	WD40 repeat-like protein	460	0	53.98	4.64714	3.31655	4.40522	0.0358291
LE01Gene09650	maintenance of ploidy protein mob2	240	8.46e-174	83.04	4.99021	4.4729	9.14707	0.00249116
LE01Gene12198	hypothetical protein LENED_006803	290	1.57e-83	77.99	4.74056	3.69474	5.96065	0.0146287
LE01Gene09749	Zn -Cys binuclear cluster domain-containing protein	588	0	59.08	4.8286	3.99713	8.08009	0.00447543
LE01Gene00097	TauD-domain-containing protein	168	2.95e-71	77.14	4.74011	3.68373	5.92875	0.0148958
LE01Gene09767	tetratricopeptide repeat protein 15-like	462	0	74.97	4.6475	3.32987	4.43354	0.0352394
LE01Gene09820	histone-fold-containing protein	161	1.16e-89	83.88	4.91083	4.22269	7.00367	0.00813429
LE01Gene12215	glycosyl transferase family 2 protein	130	1.35e-80	66.74	5.65431	5.81247	19.0374	1.28e-05
LE01Gene02362	predicted protein	646	4.05e-141	51.73	4.64697	3.31034	4.39217	0.0361043
LE01Gene02370	predicted protein	403	0	71.98	4.64714	3.31655	4.40522	0.0358291
LE01Gene02381	clathrin adaptor, mu subunit	439	0	89.93	4.74047	3.69242	5.95388	0.0146849
LE01Gene02405	MFS general substrate transporter	532	0	78.59	5.265	2.2617	6.25766	0.0123657
LE01Gene02498	predicted protein	701	0	70.99	4.74056	3.69474	5.96065	0.0146287
LE01Gene02558	Meiotically up-regulated gene 180 protein	393	0	63.56	5.06346	4.62929	11.1586	0.000836453
LE01Gene12249	oligosaccharide translocation protein rft1	553	0	67.88	4.74082	3.70111	5.97911	0.0144763
LE01Gene10117	Nucleotidyltransferase	478	0	48.41	4.64759	3.33342	4.44117	0.0350822
LE01Gene10133	pfkb family	536	0	75.43	5.20181	2.1028	5.29059	0.0214409
LE01Gene10148	predicted protein	619	0	51.31	4.6475	3.32987	4.43354	0.0352394
LE01Gene10164	predicted protein	295	0	58.46	4.64697	3.31034	4.39217	0.0361043
LE01Gene10272	mismatched base pair and cruciform DNA recognition protein	103	3.06e-51	83.28	5.69878	4.00205	19.6954	9.08e-06
LE01Gene10338	fruit-body specific protein a	509	0	72.21	5.06325	2.65919	4.25607	0.0391103
LE01Gene12298	phosphoglycerate mutase-like protein	227	5.86e-166	70.65	4.64678	3.30327	4.37714	0.0364241
LE01Gene12310	glycoside hydrolase family 78 protein	431	1.57e-141	57.23	4.7405	3.69301	5.95576	0.0146692
LE01Gene02626	predicted protein	324	0	63.43	4.64759	3.33342	4.44117	0.0350822
LE01Gene02656	---NA---	126			4.98936	2.47771	5.14074	0.0233706
LE01Gene02676	DUF1688-domain-containing protein	440	0	78.06	5.32811	2.43272	6.57101	0.0103653
LE01Gene02681	hypothetical protein GYMLUDRAFT_45622	533	1.01e-76	55.87	4.64697	3.31034	4.39217	0.0361043
LE01Gene02683	sucrose transporter	1595	0	69.1	5.20084	2.1028	5.29061	0.0214408
LE01Gene02685	heat shock factor-binding protein 1-like	119	6.65e-80	78.71	4.64723	3.3201	4.41279	0.0356704
LE01Gene12321	mitochondrial carrier	300	0	91.52	5.44342	2.05051	6.27266	0.0122615
LE01Gene02691	hypothetical protein LENED_003944	92	1.6e-28	80.32	6.20512	2.08874	15.0691	0.000103644
LE01Gene10625	predicted protein	272	0	91.66	5.49774	2.78082	11.6016	0.000658937
LE01Gene10634	glycoside hydrolase family 3 protein	796	0	75.77	4.64723	3.3201	4.41279	0.0356704
LE01Gene10671	cysteine proteinase	648	0	68.91	5.13477	4.80424	13.8922	0.000193596
LE01Gene10735	DEAD-domain-containing protein	443	0	83.07	5.13574	4.81593	13.3707	0.000255583
LE01Gene10759	hypothetical protein LENED_009327	237	3.22e-172	71.28	4.64723	3.3201	4.41279	0.0356704
LE01Gene10816	atp binding	392	0	80.5	4.64688	3.30681	4.38465	0.036264
LE01Gene10879	oxidase-like protein	401	0	63.5	4.64733	3.32364	4.42038	0.0355122
LE01Gene10931	coatomer complex protein	313	0	84.99	5.20084	2.1028	5.29061	0.0214408
LE01Gene11021	RNA-binding protein	209	5.4e-154	75.32	4.82896	3.99946	7.94345	0.00482617
LE01Gene11055	---NA---	233			4.64714	3.31655	4.40522	0.0358291
LE01Gene11168	predicted protein	915	0	66.62	4.91086	4.22751	7.6729	0.00560564
LE01Gene03336	Der1-like protein	209	9.55e-147	92.38	4.7404	3.69069	5.949	0.0147256
LE01Gene02895	WD40 repeat-like protein	340	0	87.89	5.06438	2.69799	5.47955	0.0192402
LE01Gene02903	adenyl-nucleotide exchange factor	430	0	58.85	4.64697	3.31034	4.39217	0.0361043
LE01Gene02942	gamma-tubulin complex, DGRIP84/SPC97 component	865	0	78.84	4.64697	3.31034	4.39217	0.0361043
LE01Gene02981	short-chain dehydrogenase reductase sdr	242	2.84e-166	71.6	5.20191	2.1028	5.29057	0.0214412
LE01Gene02991	TPR-like protein	305	0	79.58	5.26601	3.17987	9.931	0.00162519
LE01Gene03035	MFS general substrate transporter	393	0	66.89	4.64714	3.31655	4.40522	0.0358291
LE01Gene11294	alpha beta hydrolase fold protein	336	0	67.12	4.82905	4.02052	6.57626	0.0103348
LE01Gene11314	putative monooxygenase	636	0	55.58	4.64688	3.30681	4.38465	0.036264
LE01Gene11322	hypothetical protein LENED_000110	778	0	78.96	5.32828	2.41311	7.7193	0.00546337
LE01Gene11335	MFS general substrate transporter	554	0	76.74	5.26537	2.26628	6.4849	0.0108795
LE01Gene11351	MFS general substrate transporter	557	0	79.93	5.13463	2.87361	7.82169	0.0051623
LE01Gene11354	kinase-like protein	414	3.41e-130	47.63	5.87472	2.09281	8.60634	0.00334995
LE01Gene11470	Tcp11-domain-containing protein	752	0	60.01	5.65141	2.48273	11.5751	0.000668396
LE01Gene11505	hexose transporter	400	0	63.8	4.64759	3.33342	4.44117	0.0350822
LE01Gene11531	phosphoribosylglycinamide synthetase	610	0	51.99	4.6475	3.32987	4.43354	0.0352394
LE01Gene11537	related to stress response protein rds1p	590	0	73.86	5.49661	2.16269	7.22569	0.00718676
LE01Gene11538	putative zinc finger/binuclear cluster transcriptional regulator	806	0	73.45	5.13496	4.80472	14.3734	0.000149905
LE01Gene11591	MFS general substrate transporter	609	0	78.19	4.82957	4.07978	4.32887	0.0374711
LE01Gene11640	RNA polymerase I-specific transcription initiation factor RRN3	866	0	67.42	4.98926	2.47771	5.14072	0.023371
LE01Gene11704	2-amino-3-carboxymuconate-6-semialdehyde decarboxylase	317	0	59.72	4.74021	3.68605	5.93549	0.0148389
LE01Gene11716	hypothetical protein LENED_005474	597	0	73.82	5.44413	2.04614	6.37815	0.0115534
LE01Gene03436	predicted protein	730	0	58.82	6.3609	2.11525	16.8802	3.98e-05
LE01Gene03446	hypothetical protein LENED_010019	228	1.18e-167	75.71	4.6475	3.32987	4.43354	0.0352394
LE01Gene03458	Phosphatidylglycerol/phosphatidylinositol transfer protein	187	4.83e-86	70.68	4.64785	3.34322	4.46209	0.034655
LE01Gene12350	predicted protein	343	0	76.84	4.64759	3.33342	4.44117	0.0350822
LE01Gene12409	predicted protein	828	0	55.85	5.20108	3.0371	9.2355	0.00237368
LE01Gene12489	Altered inheritance of mitochondria protein 9, mitochondrial	434	0	52.91	4.6475	3.32987	4.43354	0.0352394
LE01Gene12503	IATP ATPase inhibitor	81	2.4e-51	79.91	4.64688	3.30681	4.38465	0.036264
LE01Gene12583	FAD/NAD-P-binding domain-containing protein	479	0	72.19	4.64723	3.3201	4.41279	0.0356704
LE01Gene00164	Protein LTV1	565	0	74.77	4.91102	4.24496	9.69921	0.00184347
LE01Gene03491	MRG-domain-containing protein	366	0	72.58	5.20193	4.95119	16.1685	5.8e-05
LE01Gene03492	Secretory component protein SHR3	176	1.9e-105	80.45	4.64723	3.3201	4.41279	0.0356704
LE01Gene03506	Sm-like ribonucleo protein	127	9.94e-85	95.49	5.20179	3.0371	9.23554	0.00237363
LE01Gene00175	DASH complex subunit DAM1	265	3.41e-174	78.35	4.74047	3.69242	5.95388	0.0146849
LE01Gene03547	predicted protein	626	0	74.09	4.74118	3.70981	6.00446	0.0142698
LE01Gene00179	transmembrane partial	266	8.54e-159	57.33	4.74092	3.70344	5.98591	0.0144206
LE01Gene03646	hypothetical protein GYMLUDRAFT_86751	171	5.8e-50	91.14	5.83215	2.81715	16.7419	4.28e-05
LE01Gene03649	phosphatase	231	3.03e-144	78.85	4.98943	4.45612	11.2392	0.000800889
LE01Gene03658	phospholipid methyltransferase	288	1.15e-147	85.9	5.38791	3.43918	13.536	0.000234029
LE01Gene12808	predicted protein	183	1.09e-77	67.84	5.20138	2.1028	5.29057	0.0214412
LE01Gene12853	3-beta hydroxysteroid dehydrogenase isomerase family protein	339	0	70.49	4.64707	3.31388	4.39971	0.035945
LE01Gene12979	manganese and iron superoxide dismutase	446	1.27e-123	69	4.64678	3.30327	4.37714	0.0364241
LE01Gene13057	MFS general substrate transporter	590	0	76.17	4.91078	2.22977	3.85702	0.0495382
LE01Gene13068	hypothetical protein LENED_005171	183	1.17e-133	99.45	5.06383	2.68917	6.44424	0.0111312
LE01Gene13128	CMGC/CLK protein kinase	534	0	86.55	4.74021	3.68605	5.93549	0.0148389
LE01Gene03808	endoplasmic reticulum protein	400	0	69.85	4.64723	3.3201	4.41279	0.0356704
LE01Gene03837	predicted protein	964	0	71.67	5.06393	2.68921	6.47275	0.0109541
LE01Gene13154	hypothetical protein LENED_007724	180	1.63e-129	69.36	4.82808	3.98829	7.38765	0.00656734
LE01Gene13269	hypothetical protein LENED_004439	896	0	74.81	5.99252	2.29424	14.4073	0.000147227
LE01Gene13292	predicted protein	396	9.86e-153	65.81	4.98914	4.44156	9.32368	0.00226212
LE01Gene13297	predicted protein	302	5.25e-159	72.77	4.74066	3.69706	5.96743	0.0145725
LE01Gene13379	predicted protein	447	7.67e-21	42.05	7.85715	2.22539	60.149	8.79e-15
LE01Gene00246	predicted protein	488	0	58.27	4.64678	3.30327	4.37714	0.0364241
LE01Gene13390	S-adenosyl-L-methionine-dependent methyltransferase	181	2.1e-70	93.08	4.6475	3.32987	4.43354	0.0352394
LE01Gene03931	tyrosine serine protein	288	1.28e-136	71.83	4.64733	3.32364	4.42038	0.0355122
LE01Gene03949	malate synthase	540	0	89.95	4.74021	3.68605	5.93549	0.0148389
LE01Gene03965	S-adenosyl-L-methionine-dependent methyltransferase	368	0	83.68	4.6475	3.32987	4.43354	0.0352394
LE01Gene04005	Plasma membrane fusion protein PRM1	976	0	70.01	6.02751	2.04979	12.4391	0.000420435
LE01Gene04032	CRAL/TRIO domain-containing protein	385	0	67.76	4.64723	3.3201	4.41279	0.0356704
LE01Gene13517	nadp-specific glutamate dehydrogenase	457	0	88.9	4.74082	3.70111	5.97911	0.0144763
LE01Gene13523	carbohydrate esterase family 4 protein	419	0	79.19	7.31385	3.2776	71.5541	2.7e-17
LE01Gene13528	predicted protein	111	1.5e-31	67.62	5.20105	3.0371	9.23547	0.00237372
LE01Gene13550	Oxysterol-binding protein	377	2.53e-147	52.37	4.64733	3.32364	4.42038	0.0355122
LE01Gene00280	predicted protein	470	0	62.91	4.64714	3.31655	4.40522	0.0358291
LE01Gene13694	DNA-directed RNA polymerase RPB5 subunit	208	8.93e-148	93.14	4.74102	3.70576	5.99272	0.014365
LE01Gene04077	transcription initiation factor IIA gamma subunit	114	5.66e-79	97	4.64697	3.31034	4.39217	0.0361043
LE01Gene00294	ARM repeat-containing protein	659	0	71.96	4.91121	4.24317	8.96734	0.00274849
LE01Gene04110	cytochrome p450	552	0	64.35	5.32888	5.21283	16.0122	6.29e-05
LE01Gene04146	predicted protein	155	2.09e-107	83.75	5.20215	3.0371	9.23551	0.00237366
LE01Gene04160	ER lumen protein retaining receptor	212	2.86e-154	95.57	4.98989	4.46338	8.51913	0.00351433
LE01Gene04172	DUF1744-domain-containing protein	2217	0	85.22	5.44275	2.04667	6.77982	0.00921942
LE01Gene04209	TBPIP-domain-containing protein	236	3.82e-171	81.18	4.6475	3.32987	4.43354	0.0352394
LE01Gene13736	glycosyltransferase family 1 protein	524	0	68.4	4.64688	3.30681	4.38465	0.036264
LE01Gene13786	SIR2-domain-containing protein	590	0	73.62	5.26554	2.26628	6.4849	0.0108795
LE01Gene00318	glycosyltransferase family 22 protein	702	0	77.28	5.69766	2.1123	9.41884	0.00214767
LE01Gene00319	predicted protein	424	0	80.37	5.064	4.64061	12.4157	0.000425742
LE01Gene13913	HIT-like protein	138	6.94e-97	90.61	4.7403	3.68837	5.94224	0.0147822
LE01Gene04239	glycoside hydrolase family 71 protein	519	0	68.47	5.20091	2.10279	5.29059	0.021441
LE01Gene04248	pentafunctional arom polypeptide	1606	0	83.91	5.32696	2.41604	6.66547	0.00982987
LE01Gene04249	nadh dehydrogenase	564	0	84.34	5.06462	4.64379	12.571	0.000391779
LE01Gene04258	---NA---	115			5.13408	2.87266	7.73279	0.00542269
LE01Gene04261	hypothetical protein GYMLUDRAFT_42989	292	5e-98	65.24	4.98962	2.47773	5.14082	0.0233696
LE01Gene00325	gamma-tubulin ring complex protein	753	0	77.78	5.06331	2.68919	6.47267	0.0109546
LE01Gene04288	predicted protein	265	0	51.52	5.20136	2.10279	5.29058	0.0214411
LE01Gene04325	PLP-dependent transferase	802	0	66.13	5.32664	2.41311	7.7193	0.00546337
LE01Gene13974	predicted protein	340	3.31e-166	53.94	4.64723	3.3201	4.41279	0.0356704
LE01Gene14056	FAD/NAD(P)-binding domain-containing protein	454	0	80.01	4.64733	3.32364	4.42038	0.0355122
LE01Gene14120	hypothetical protein LENED_007229	133	9.8e-17	79.87	6.504	3.42842	25.9992	3.42e-07
LE01Gene04481	predicted protein	509	0	62.96	4.6475	3.32987	4.43354	0.0352394
LE01Gene04601	AMP-dependent synthetase and ligase	1623	0	79.55	4.82825	3.98666	6.57387	0.0103487
LE01Gene04611	Protein MEI2-like 2	202	1.09e-100	66.07	4.64697	3.31034	4.39217	0.0361043
LE01Gene04701	hypothetical protein LENED_010857	319	0	57.93	5.8347	3.39095	20.3236	6.54e-06
LE01Gene14306	Mechanosensitive ion channel protein 5	1075	0	66.94	5.74379	2.20348	10.5776	0.00114467
LE01Gene00401	NAD(P)-binding protein	344	0	75.6	4.74047	3.69242	5.95388	0.0146849
LE01Gene14316	acyl- oxidase	563	0	85.27	4.989	2.47769	5.14064	0.023372
LE01Gene14397	MFS general substrate transporter	494	0	74.28	7.07936	2.95854	31.6232	1.87e-08
LE01Gene14402	predicted protein	424	0	53.04	4.98934	4.45646	11.3192	0.000767107
LE01Gene04774	mfs transporter	140	3.2e-27	100	4.74066	3.69706	5.96743	0.0145725
LE01Gene00539	---NA---	127			4.74056	3.69474	5.96065	0.0146287
LE01Gene00561	glycosyltransferase family 1 protein	867	0	79.42	5.13463	2.87361	7.82211	0.00516108
LE01Gene00585	argininosuccinate lyase	463	0	93.47	5.44375	2.66838	10.2825	0.00134301
LE01Gene00710	predicted protein	270	0	91.26	4.91104	2.22981	3.85715	0.0495344
LE01Gene00731	predicted protein	363	9.79e-145	61.46	4.64697	3.31034	4.39217	0.0361043
LE01Gene00748	glycosyltransferase family 15 protein	412	0	72.73	4.74092	3.70344	5.98591	0.0144206
LE01Gene00754	ARM repeat-containing protein	563	0	58.75	5.44272	2.0235	5.33608	0.0208884
LE01Gene00767	dolichol phosphate-mannose biosynthesis regulatory protein	88	3.07e-58	84.5	4.64688	3.30681	4.38465	0.036264
LE01Gene00779	DNA-directed RNA polymerase I	70	8.98e-47	83.77	4.8285	3.99717	7.32184	0.00681218
LE01Gene00796	WD40 repeat-like protein	592	0	78.07	5.20257	3.0371	9.23551	0.00237366
LE01Gene00866	mitochondrial carrier	876	0	55.53	4.64733	3.32364	4.42038	0.0355122
LE01Gene00872	hypothetical protein LENED_002756	269	0	59.58	6.88208	2.35287	18.5103	1.69e-05
LE01Gene00890	FAD/NAD(P)-binding domain-containing protein	538	0	73.56	4.64733	3.32364	4.42038	0.0355122
LE01Gene00893	MFS general substrate transporter	588	0	81.16	4.7403	3.68837	5.94224	0.0147822
LE01Gene00915	heat shock protein 9	88	2.02e-55	82.88	5.60279	3.8444	19.4454	1.04e-05
LE01Gene00916	---NA---	229			4.91164	4.24505	9.69966	0.00184302
LE01Gene00465	FAD/NAD-P-binding domain-containing protein	605	0	71.79	5.26521	2.26652	6.41321	0.0113275
LE01Gene00951	predicted protein	329	0	69.2	4.6475	3.32987	4.43354	0.0352394
LE01Gene00955	gated mechanosensitive channel	182	7.74e-133	75.34	5.06348	2.68827	6.36872	0.0116149
LE01Gene00469	predicted protein	125	2.62e-90	97.64	5.3276	2.41146	7.48183	0.00623247
LE01Gene00958	cytoplasmic protein	256	4.64e-154	92.54	4.64723	3.3201	4.41279	0.0356704
LE01Gene04954	GTP binding protein 4	673	0	90.93	5.26637	5.08231	16.9175	3.9e-05
LE01Gene05002	hypothetical protein LENED_010088	115	1.88e-37	69.13	5.20145	2.1028	5.29058	0.021441
LE01Gene05008	RNA polymerase II-associated protein	1092	0	82.92	4.8286	3.99713	8.08009	0.00447543
LE01Gene05023	cAMP-independent regulatory protein pac2	311	6.54e-173	71.88	6.30024	2.01587	15.4719	8.37e-05
LE01Gene05041	hypothetical protein LENED_003093	151	6.68e-105	66.46	4.64759	3.33342	4.44117	0.0350822
LE01Gene05221	hypothetical protein WG66_7810	146	3.68e-67	76.14	4.74082	3.70111	5.97911	0.0144763
LE01Gene05239	DUF1295-domain-containing protein	335	0	86	4.9891	2.4777	5.14067	0.0233716
LE01Gene05298	predicted protein	265	0	86.96	4.98969	4.45649	11.3193	0.000767048
LE01Gene05368	nucleoporin nup40	369	0	72.24	4.74047	3.69242	5.95388	0.0146849
LE01Gene05370	lea domain-containing protein	242	3.63e-155	86.39	5.06331	2.68919	6.47267	0.0109546
LE01Gene05381	thyroid receptor-interacting protein 13	471	0	82.64	4.64723	3.3201	4.41279	0.0356704
LE01Gene05384	predicted protein	309	3.53e-131	71.75	5.64929	2.01503	8.28894	0.00398874
LE01Gene03060	mitochondrial cytochrome c oxidase subunit VIa	124	5.6e-84	74.18	5.3278	2.39438	4.87197	0.0272963
LE01Gene05454	hypothetical protein LENED_000896	1000	0	70.15	5.06426	4.64133	12.7948	0.000347577
LE01Gene05470	nucleic acid-binding protein	187	1.79e-97	64.77	4.64688	3.30681	4.38465	0.036264
LE01Gene05493	ef hand domain-containing protein	561	0	57.59	4.64733	3.32364	4.42038	0.0355122
LE01Gene05518	GroES-like protein	361	0	69.46	4.7403	3.68837	5.94224	0.0147822
LE01Gene03073	Dilute domain-containing protein	879	0	77.25	5.06428	2.69133	6.23024	0.0125587
LE01Gene05547	MFS general substrate transporter	457	0	73.59	4.74056	3.69474	5.96065	0.0146287
LE01Gene09535	predicted protein	483	6.19e-65	55.09	-2.21269	7.18833	31.2413	2.28e-08
LE01Gene04204	AAA-domain-containing protein	1004	0	77.42	-2.63038	6.34657	20.0195	7.67e-06
LE01Gene00142	ras GEF	481	0	61.6	-2.20701	6.48539	17.6859	2.61e-05
LE01Gene11793	family S53 protease-like protein	593	0	76.24	-2.16685	6.46012	16.8209	4.11e-05
LE01Gene11659	PIN domain-like protein	989	0	65.28	-2.28704	6.34671	16.5012	4.86e-05
LE01Gene08350	DEAD-domain-containing protein	499	0	86.48	-2.28703	6.34598	16.501	4.86e-05
LE01Gene10429	Protein PBN1	232	7.39e-84	51.86	-3.01021	5.94223	16.4128	5.09e-05
LE01Gene06336	cerato-platanin 6	141	6.31e-69	76.3	-2.28556	6.34626	16.1285	5.92e-05
LE01Gene14346	hypothetical protein GYMLUDRAFT_72651	277	3.44e-70	67.82	-2.61402	6.05501	15.2598	9.37e-05
LE01Gene11459	hypothetical protein LENED_007608	350	3.08e-149	63.71	-2.34485	6.159	14.4603	0.000143143
LE01Gene11301	glycoside hydrolase family 47 protein	563	0	72.68	-2.27768	6.53585	14.244	0.000160576
LE01Gene09888	FAD/NAD(P)-binding domain-containing protein	416	0	69.86	-2.81243	5.82218	13.4085	0.000250488
LE01Gene06417	TAP42-like protein	391	0	76.21	-2.49581	5.98352	13.3648	0.000256386
LE01Gene08389	general substrate transporter	423	0	82.91	-4.77847	5.25947	12.9578	0.000318588
LE01Gene04639	E3 ubiquitin-protein ligase TTC3	179	3.58e-73	93.06	-3.30484	5.59252	12.87	0.000333895
LE01Gene00676	predicted protein	385	0	82.39	-2.73998	5.77922	12.4242	0.000423804
LE01Gene05704	---NA---	229			-2.73995	5.77779	12.4239	0.000423864
LE01Gene11256	predicted protein	530	0	68.49	-3.72361	5.86008	12.3424	0.000442784
LE01Gene03184	galactose mutarotase-like protein	298	0	81.01	-4.78345	5.26025	12.0569	0.000516022
LE01Gene04028	choline transport protein	569	0	69.97	-4.64621	5.19457	11.7885	0.000595971
LE01Gene08528	rint-1 family protein	836	0	72.62	-3.11743	5.49108	10.7721	0.00103043
LE01Gene10652	hypothetical protein LENED_011443	1352	0	55.21	-3.1174	5.48944	10.7718	0.00103059
LE01Gene01582	DUF1716-domain-containing protein	644	0	79.71	-3.11738	5.48979	10.7717	0.00103064
LE01Gene03901	Rpr2-domain-containing protein	221	3.09e-148	55.8	-4.49973	5.12825	10.5108	0.00118679
LE01Gene02073	hypothetical protein SCHCODRAFT_258334	227	1.74e-18	47.46	-3.37211	5.63998	10.5006	0.00119338
LE01Gene01997	UTP-glucose-1-phosphate uridylyltransferase	503	0	97.36	-2.58313	5.68929	10.4873	0.00120198
LE01Gene05235	DUF1640-domain-containing protein	208	6.88e-153	93.15	-2.58312	5.68828	10.4872	0.00120205
LE01Gene06478	general substrate transporter	874	0	89.5	-4.49671	5.12825	10.1497	0.00144324
LE01Gene01319	Oxysterol-binding protein	95	3.96e-54	83.35	-4.51986	5.13059	9.74287	0.0018002
LE01Gene03220	MFS general substrate transporter	812	0	73.41	-3.01371	5.43655	9.73697	0.00180598
LE01Gene07037	flavin-binding monooxygenase	494	0	74.62	-3.0137	5.4369	9.7369	0.00180605
LE01Gene12190	predicted protein	417	0	80.56	-3.01369	5.43577	9.73685	0.0018061
LE01Gene05323	glycoside hydrolase family 27 protein	466	0	67.81	-2.22553	5.82285	9.72616	0.00181664
LE01Gene02301	ARM repeat-containing protein	1056	0	83.84	-2.49783	5.64276	9.53732	0.00201335
LE01Gene14126	predicted protein	445	0	54.98	-4.33863	5.05865	9.43078	0.00213373
LE01Gene05185	NMD3-domain-containing protein	550	0	88.79	-4.33863	5.05865	9.43078	0.00213373
LE01Gene06358	cytochrome P450	489	0	71.06	-4.33857	5.05865	9.41021	0.0021578
LE01Gene08131	hypothetical protein LENED_002241	171	2.39e-126	72.56	-4.33299	5.05787	9.04587	0.00263289
LE01Gene12060	MAGE-domain-containing protein	466	0	59.21	-2.59483	5.69066	9.02873	0.00265769
LE01Gene03082	predicted protein	231	6.92e-160	68.46	-4.33159	5.05787	8.94379	0.00278415
LE01Gene04270	dimeric dihydrodiol	238	6.38e-175	58.78	-4.32907	5.05787	8.75353	0.00309003
LE01Gene03202	cerato-platanin 6	143	1.59e-87	72.67	-2.90196	5.38084	8.713	0.0031595
LE01Gene12953	glycoside hydrolase family 27 protein	436	0	86.35	-2.40714	5.59421	8.60125	0.00335932
LE01Gene09498	exosome complex exonuclease rrp40	236	2.31e-162	86.04	-2.40713	5.59294	8.60121	0.00335939
LE01Gene11101	predicted protein	393	0	71.08	-4.34703	5.05944	8.54728	0.00346039
LE01Gene12113	xylose isomerase-like protein	479	8.76e-176	64.01	-4.32558	5.05787	8.47295	0.00360466
LE01Gene12083	leukotriene-a4 hydrolase	621	0	82.62	-4.32339	5.05787	8.28528	0.00399676
LE01Gene00885	DUF726-domain-containing protein	564	0	77.22	-4.32332	5.05787	8.27908	0.00401045
LE01Gene01847	Pentatricopeptide repeat-containing protein	436	0	66.23	-4.15616	4.98545	8.25054	0.004074
LE01Gene10917	peptidyl-trna hydrolase	185	7.82e-100	78.63	-4.15616	4.98545	8.25054	0.004074
LE01Gene07751	alpha beta-hydrolase	693	0	68.33	-4.15611	4.98467	8.25032	0.00407449
LE01Gene10771	ATP-binding cassette sub-family D member 2	614	0	75.09	-4.15611	4.98467	8.25032	0.00407449
LE01Gene05402	hypothetical protein LENED_003469	202	7.38e-93	73.39	-4.15611	4.98467	8.25032	0.00407449
LE01Gene04274	hypothetical protein LENED_004265	173	1.38e-120	75.32	-4.32185	5.05787	8.14867	0.00430929
LE01Gene05791	hypothetical protein LENED_001070	378	1.3e-24	57.98	-2.0687	5.73507	7.98466	0.00471753
LE01Gene02458	P-loop containing nucleoside triphosphate hydrolase protein	369	0	88.03	-2.06869	5.73541	7.98461	0.00471768
LE01Gene03557	zf-UBP-domain-containing protein	596	0	78.41	-2.06868	5.73465	7.98448	0.004718
LE01Gene06327	dopa -dioxygenase	185	2.42e-108	89.98	-4.31854	5.05787	7.83681	0.00511929
LE01Gene07893	molybdenum cofactor biosynthesis protein	777	0	70.21	-2.7808	5.32109	7.70166	0.005517
LE01Gene02921	glycosyltransferase family 15 protein	431	0	67.41	-2.31041	5.54376	7.68149	0.00557899
LE01Gene13538	---NA---	72			-2.31036	5.54248	7.68114	0.0055801
LE01Gene11656	Inosine/uridine-preferring nucleoside hydrolase	366	0	80.75	-2.31036	5.54258	7.68111	0.00558017
LE01Gene00744	hypothetical protein GYMLUDRAFT_46023	390	0	73.25	-4.15053	4.98467	7.61368	0.00579272
LE01Gene01403	predicted protein	357	3.89e-106	51.72	-2.20936	5.82049	7.30283	0.00688463
LE01Gene07376	hypothetical protein LENED_010277	1046	4.36e-176	100	-3.94718	4.90746	7.06999	0.00783858
LE01Gene08378	NAD(P)-binding protein	345	0	74.75	-3.94718	4.90746	7.06999	0.00783858
LE01Gene11596	predicted protein	475	0	84.15	-3.94718	4.90746	7.06999	0.00783858
LE01Gene04302	predicted protein	197	3.55e-85	67.17	-3.94718	4.90746	7.06999	0.00783858
LE01Gene05279	hypothetical protein GYMLUDRAFT_95525	552	2.7e-93	44.08	-3.94718	4.90746	7.06999	0.00783858
LE01Gene10844	predicted protein	1854	0	77.33	-2.0748	5.73719	7.0299	0.008016
LE01Gene08407	auxin efflux carrier	452	0	69.2	-3.94262	4.90668	6.84255	0.00890118
LE01Gene00668	cytosine-purine permease	517	0	74.4	-3.94261	4.90668	6.84223	0.00890275
LE01Gene03556	nudix hydrolase	272	8.65e-129	66.4	-3.94258	4.90668	6.84061	0.00891085
LE01Gene12018	UDP-glucose 4-epimerase	409	0	79.62	-2.20669	5.49141	6.77947	0.00922124
LE01Gene13935	predicted protein	157	6.08e-110	55.07	-3.94125	4.90668	6.7687	0.00927703
LE01Gene10115	predicted protein	399	0	66.83	-3.94012	4.90668	6.70695	0.00960377
LE01Gene07641	uba domain-containing protein ucp14	335	0	76.54	-2.64854	5.26048	6.70536	0.00961233
LE01Gene01425	predicted protein	375	4.3e-135	57.57	-2.64854	5.26058	6.70536	0.00961234
LE01Gene01674	PLP-dependent transferase	534	0	76.73	-2.64854	5.26058	6.70536	0.00961234
LE01Gene08702	Pheromone receptor	585	0	79.93	-2.64854	5.26058	6.70536	0.00961234
LE01Gene06276	Phosphatidylinositol 4-kinase stt4	1951	0	84.97	-2.64854	5.25971	6.70535	0.00961238
LE01Gene06719	glycerol-3-phosphate o-acyltransferase	538	0	82.89	-2.64854	5.25971	6.70535	0.00961238
LE01Gene07394	alpha/beta-hydrolase	469	0	72.39	-2.64854	5.2598	6.70535	0.0096124
LE01Gene10623	hypothetical protein GYMLUDRAFT_33385	340	1.13e-35	59.01	-2.64854	5.2598	6.70535	0.0096124
LE01Gene00132	prefoldin subunit	121	6.96e-75	90.32	-2.64854	5.2598	6.70535	0.0096124
LE01Gene04041	predicted protein	456	0	62.09	-3.93987	4.90668	6.69281	0.00968023
LE01Gene11434	isocitrate lyase	549	0	91.85	-3.93927	4.90668	6.65879	0.00986677
LE01Gene00843	DNA repair protein crb2	575	0	51.12	-3.94792	4.90746	6.65268	0.00990069
LE01Gene06229	potassium channel	441	0	67.56	-2.64995	5.26136	6.6316	0.0100185
LE01Gene01511	predicted protein	626	0	64.26	-2.64691	5.25893	6.58421	0.0102887
LE01Gene05131	Sterol 24-C-methyltransferase	455	0	69.85	-2.646	5.25928	6.5704	0.0103689
LE01Gene11282	predicted protein	490	0	70.38	-3.94805	4.90746	6.56504	0.0104001
LE01Gene12199	flavin-containing monooxygenase	555	0	75.58	-3.96434	4.90825	6.35476	0.0117067
LE01Gene00378	beta-flanking protein	203	5.08e-144	80.66	-3.93299	4.90668	6.27888	0.0122185
LE01Gene09169	rotamase-domain-containing protein	164	2.2e-103	84.53	-2.2003	5.49003	6.20894	0.0127107
LE01Gene02456	fumarylacetoacetate hydrolase	242	3.99e-151	76.47	-3.92862	4.90668	5.98149	0.0144568
LE01Gene04990	uv-damage endonuclease	949	0	82.01	-2.09494	5.4379	5.89819	0.0151564
LE01Gene07223	hypothetical protein LENED_011568	398	0	54.88	-2.09493	5.43688	5.89814	0.0151569
LE01Gene11458	CRAL/TRIO domain-containing protein	188	1.25e-131	76.78	-2.09493	5.43688	5.89814	0.0151569
LE01Gene03521	predicted protein	334	2.73e-30	46.36	-2.09492	5.43697	5.89812	0.015157
LE01Gene11296	predicted protein	666	0	78.78	-2.0949	5.43636	5.898	0.0151581
LE01Gene01295	argonaute-like protein	935	0	79.81	-2.0949	5.43645	5.89798	0.0151582
LE01Gene01069	predicted protein	478	0	52.11	-3.70285	4.8258	5.8902	0.0152254
LE01Gene08208	WD40 repeat-like protein	228	1.28e-164	96.56	-3.70285	4.8258	5.8902	0.0152254
LE01Gene08476	hypothetical protein LENED_007318	212	9.12e-43	54.63	-3.70285	4.8258	5.8902	0.0152254
LE01Gene09080	predicted protein	332	0	79.4	-3.70285	4.8258	5.8902	0.0152254
LE01Gene02721	P-loop containing nucleoside triphosphate hydrolase protein	693	0	76.62	-3.70285	4.8258	5.8902	0.0152254
LE01Gene13862	predicted protein	218	1.42e-121	71.05	-3.70285	4.8258	5.8902	0.0152254
LE01Gene14392	alternative cyclin pcl1	295	1.62e-136	77.89	-3.70285	4.8258	5.8902	0.0152254
LE01Gene14850	protein kinase	234	1.35e-116	53.02	-3.70267	4.82502	5.88961	0.0152304
LE01Gene01079	cytoplasmic trna 2-thiolation protein 2	499	0	69.31	-3.70267	4.82502	5.88961	0.0152304
LE01Gene01099	glutaredoxin	120	1.14e-68	77	-3.70267	4.82502	5.88961	0.0152304
LE01Gene06355	MATE efflux family protein	707	0	79.31	-3.70267	4.82502	5.88961	0.0152304
LE01Gene01353	hydrophobic surface binding protein	228	1.45e-118	65.47	-3.70267	4.82502	5.88961	0.0152304
LE01Gene07759	NAD(P)-binding protein	353	0	75.06	-3.70267	4.82502	5.88961	0.0152304
LE01Gene07960	Nucleotidylyl transferase	349	0	69.19	-3.70267	4.82502	5.88961	0.0152304
LE01Gene08397	bifunctional 6-phosphofructo-2-kinase/fructose-2,6-bisphosphate 2-phosphatase	538	0	74.06	-3.70267	4.82502	5.88961	0.0152304
LE01Gene08484	proteinkinasesubdomain-containingproteinPKL ccin9	245	6.6e-180	54.61	-3.70267	4.82502	5.88961	0.0152304
LE01Gene08867	predicted protein	397	0	86.91	-3.70267	4.82502	5.88961	0.0152304
LE01Gene10589	predicted protein	602	0	52.92	-3.70267	4.82502	5.88961	0.0152304
LE01Gene10871	general substrate transporter	182	4.08e-134	72.73	-3.70267	4.82502	5.88961	0.0152304
LE01Gene00157	putative terpenoid synthase	71	1.23e-44	77.36	-3.70267	4.82502	5.88961	0.0152304
LE01Gene13403	malate dehydrogenase	278	5.43e-170	60.26	-3.70267	4.82502	5.88961	0.0152304
LE01Gene13565	Clavaminate synthase-like protein	448	0	65.28	-3.70267	4.82502	5.88961	0.0152304
LE01Gene04173	map kinase	428	0	95.48	-3.70267	4.82502	5.88961	0.0152304
LE01Gene04189	hypothetical protein LENED_007457	295	2.95e-136	51.59	-3.70267	4.82502	5.88961	0.0152304
LE01Gene00310	NAF1-domain-containing protein	601	0	61.37	-3.70267	4.82502	5.88961	0.0152304
LE01Gene04652	hypothetical protein LENED_009940	253	0	59.46	-3.70267	4.82502	5.88961	0.0152304
LE01Gene00809	short-chain oxidoreductase	289	2.03e-31	51.72	-3.70267	4.82502	5.88961	0.0152304
LE01Gene04967	cytochrome P450	557	0	57.16	-3.70267	4.82502	5.88961	0.0152304
LE01Gene05283	predicted protein	535	7.13e-87	44.16	-3.70267	4.82502	5.88961	0.0152304
LE01Gene05308	actin binding protein	445	0	69.21	-3.92702	4.90668	5.86408	0.0154529
LE01Gene03098	predicted protein	706	3.86e-126	44.04	-2.50292	5.19594	5.72658	0.01671
LE01Gene08134	conjugated polyketone reductase C1	317	0	76.48	-2.50293	5.19637	5.72658	0.01671
LE01Gene05005	hypothetical protein GYMLUDRAFT_254792	255	5.81e-27	42.84	-2.50293	5.19646	5.72656	0.0167102
LE01Gene05385	transport protein particle complex subunit	178	1.02e-114	89.65	-2.50293	5.19646	5.72655	0.0167103
LE01Gene01549	mitochondrial NAD-dependent isocitrate dehydrogenase subunit 1 precursor	375	0	95.55	-2.50294	5.19715	5.72652	0.0167105
LE01Gene12333	MFS general substrate transporter	488	0	81.77	-2.50293	5.19672	5.7265	0.0167107
LE01Gene09380	WD40 repeat-like protein	830	0	59.49	-2.50293	5.19672	5.72649	0.0167109
LE01Gene11259	aminoglycoside phosphotransferase APH(3)	348	5.18e-65	65.74	-2.50295	5.19793	5.72632	0.0167124
LE01Gene03570	predicted protein	526	0	45.71	-2.34095	5.12927	4.75698	0.0291797
LE01Gene11386	quinate utilization pathway activator	651	0	87.43	-2.34095	5.12927	4.75697	0.0291798
LE01Gene09158	sugar transporter	519	0	78.68	-2.34095	5.12927	4.75689	0.0291813
LE01Gene02352	dna-directed rna polymerase	134	6.95e-95	97.2	-2.34095	5.12927	4.75688	0.0291815
LE01Gene03144	mitochondrion protein	137	5.5e-97	77.05	-2.34091	5.12936	4.7564	0.0291896
LE01Gene06505	cytochrome P450	599	0	59.67	-2.3409	5.12936	4.75593	0.0291975
LE01Gene08870	predicted protein	1279	0	75.65	-2.3409	5.12936	4.75548	0.0292051
LE01Gene09502	26S proteasome subunit P45	171	2.37e-101	68.53	-2.3409	5.12936	4.75506	0.0292122
LE01Gene03666	muconate cycloisomerase 1	509	0	58.41	-2.3409	5.12936	4.75462	0.0292197
LE01Gene13416	Macrophage erythroblast attacher	409	0	80.17	-2.3409	5.12936	4.75409	0.0292288
LE01Gene05153	glycosyltransferase family 25 protein	451	0	57.19	-2.3409	5.12936	4.75374	0.0292347
LE01Gene06164	CDK-activating kinase assembly factor	391	0	83.27	-2.34073	5.12962	4.74902	0.029315
LE01Gene12451	chromatin remodeling complex subunit	532	7.39e-74	44.84	-2.34072	5.12962	4.74832	0.029327
LE01Gene04517	cytochrome p450	559	0	66.22	-2.34071	5.12962	4.74763	0.0293387
LE01Gene10758	hypothetical protein LENED_009327	525	0	95.02	-2.3412	5.1304	4.74073	0.0294565
LE01Gene02563	isoflavone reductase	325	0	65.03	-2.34156	5.13005	4.74043	0.0294617
LE01Gene07201	glycoside hydrolase family 76 protein	257	7.11e-180	74.24	-2.34121	5.1304	4.74035	0.029463
LE01Gene05898	hypothetical protein LENED_006442	411	7.4e-106	83.64	-2.34148	5.13014	4.73961	0.0294758
LE01Gene05045	hypothetical protein	686	0	69.44	-2.34148	5.13014	4.73953	0.0294771
LE01Gene03510	predicted protein	802	0	77.09	-2.33998	5.12848	4.71549	0.0298921
LE01Gene03301	cyclin-like protein	374	0	79.91	-2.33982	5.12858	4.71421	0.0299143
LE01Gene11839	---NA---	287			-2.34749	5.13083	4.61997	0.0316017
LE01Gene08224	hypothetical protein LENED_012702	270	4.91e-163	55.92	-2.34551	5.13118	4.61443	0.031704
LE01Gene10674	predicted protein	110	2.55e-73	94.05	-3.43029	4.73915	4.44	0.0351061
LE01Gene06024	hypothetical protein LENED_002482	538	0	74.81	-3.41438	4.73836	4.40254	0.0358854
LE01Gene07567	hypothetical protein LENED_006359	214	9.36e-128	72.31	-3.41438	4.73836	4.40254	0.0358854
LE01Gene07866	predicted protein	207	1.65e-131	56.99	-3.41438	4.73836	4.40254	0.0358854
LE01Gene08348	flavonol synthase/flavanone 3-hydroxylase	338	0	79.88	-3.41438	4.73836	4.40254	0.0358854
LE01Gene01776	Sodium/hydrogen exchanger	556	0	70.43	-3.41438	4.73836	4.40254	0.0358854
LE01Gene09138	predicted protein	441	0	57.57	-3.41438	4.73836	4.40254	0.0358854
LE01Gene12175	actin regulatory protein	401	0	74.59	-3.41438	4.73836	4.40254	0.0358854
LE01Gene09824	hypothetical protein LENED_003455	148	2.64e-105	98.65	-3.41438	4.73836	4.40254	0.0358854
LE01Gene10239	histone deacetylase	580	0	87.65	-3.41438	4.73836	4.40254	0.0358854
LE01Gene10305	molybdenum cofactor synthesis 3	387	0	80.8	-3.41438	4.73836	4.40254	0.0358854
LE01Gene11081	predicted protein	430	0	54.98	-3.41438	4.73836	4.40254	0.0358854
LE01Gene02835	DUF453 domain-containing protein	384	0	72.22	-3.41438	4.73836	4.40254	0.0358854
LE01Gene12972	hypothetical protein LENED_010647	467	0	69.07	-3.41438	4.73836	4.40254	0.0358854
LE01Gene04858	Gamma-tubulin complex component 5	1175	0	63.53	-3.41438	4.73836	4.40254	0.0358854
LE01Gene00046	fad binding domain-containing protein	509	0	67.09	-3.41438	4.73836	4.40254	0.0358854
LE01Gene05329	FSH1-domain-containing protein	268	0	68.04	-3.41438	4.73836	4.40254	0.0358854
LE01Gene03109	peptide chain release factor 1	340	0	84.09	-3.39847	4.73757	4.36536	0.0366768
LE01Gene05923	---NA---	249			-3.39847	4.73757	4.36536	0.0366768
LE01Gene06038	hypothetical protein LENED_001246	345	1.13e-128	66.1	-3.39847	4.73757	4.36536	0.0366768
LE01Gene06234	protein serine/threonine phosphatase 2C	443	0	55.46	-3.39847	4.73757	4.36536	0.0366768
LE01Gene03155	hypothetical protein LENED_005352	180	3.38e-131	98.89	-3.39847	4.73757	4.36536	0.0366768
LE01Gene01303	predicted protein	532	0	66.71	-3.39847	4.73757	4.36536	0.0366768
LE01Gene14858	hypothetical protein LENED_004140	249	5.05e-164	82.39	-3.39847	4.73757	4.36536	0.0366768
LE01Gene06996	hypothetical protein GYMLUDRAFT_101115	552	5.88e-115	49.24	-3.39847	4.73757	4.36536	0.0366768
LE01Gene07027	predicted protein	158	1e-49	58.55	-3.39847	4.73757	4.36536	0.0366768
LE01Gene07088	PR-1 protein	300	2.18e-165	66.03	-3.39847	4.73757	4.36536	0.0366768
LE01Gene07173	DUF159-domain-containing protein	321	0	73.35	-3.39847	4.73757	4.36536	0.0366768
LE01Gene07385	C-8 sterol isomerase	514	0	50.68	-3.39847	4.73757	4.36536	0.0366768
LE01Gene01472	dna repair protein rev1	256	1.65e-159	72.88	-3.39847	4.73757	4.36536	0.0366768
LE01Gene07846	delta-12 fatty acid desaturase protein	416	0	75.06	-3.39847	4.73757	4.36536	0.0366768
LE01Gene11969	hypothetical protein LENED_008093	152	1.1e-108	83.9	-3.39847	4.73757	4.36536	0.0366768
LE01Gene00083	f1 atpase assembly protein 11	116	1.13e-57	73.08	-3.39847	4.73757	4.36536	0.0366768
LE01Gene08473	erg4 erg24 ergosterol biosynthesis-like protein	204	2.42e-80	55.08	-3.39847	4.73757	4.36536	0.0366768
LE01Gene08863	splicing factor 3b subunit 4	317	0	94.89	-3.39847	4.73757	4.36536	0.0366768
LE01Gene08925	predicted protein	293	0	72.8	-3.39847	4.73757	4.36536	0.0366768
LE01Gene02302	rad26 atrip	916	0	55.67	-3.39847	4.73757	4.36536	0.0366768
LE01Gene12302	zf-cchc type zinc finger protein	334	0	64.05	-3.39847	4.73757	4.36536	0.0366768
LE01Gene10511	hemerythrin hhe cation binding domain-containing protein	289	0	64.51	-3.39847	4.73757	4.36536	0.0366768
LE01Gene10515	hypothetical protein LENED_012471	248	4.3e-138	100	-3.39847	4.73757	4.36536	0.0366768
LE01Gene11002	HAD hydrolase	379	0	69.7	-3.39847	4.73757	4.36536	0.0366768
LE01Gene11648	MFS general substrate transporter	286	4.62e-174	70.67	-3.39847	4.73757	4.36536	0.0366768
LE01Gene03396	cytochrome b2	480	0	82.58	-3.39847	4.73757	4.36536	0.0366768
LE01Gene11721	predicted protein	247	4.93e-151	69.72	-3.39847	4.73757	4.36536	0.0366768
LE01Gene11798	predicted protein	345	0	60.9	-3.39847	4.73757	4.36536	0.0366768
LE01Gene12497	hypothetical protein LENED_008241	671	0	66.81	-3.39847	4.73757	4.36536	0.0366768
LE01Gene12699	serine threonine protein kinase	1282	0	63.1	-3.39847	4.73757	4.36536	0.0366768
LE01Gene12762	hypothetical protein LENED_008862	213	1.09e-157	99.53	-3.39847	4.73757	4.36536	0.0366768
LE01Gene03596	Brix-domain-containing protein	374	0	85.19	-3.39847	4.73757	4.36536	0.0366768
LE01Gene13271	hypothetical protein LENED_004437	132	7.58e-86	100	-3.39847	4.73757	4.36536	0.0366768
LE01Gene13293	hypothetical protein LENED_007099	300	1.19e-71	99.18	-3.39847	4.73757	4.36536	0.0366768
LE01Gene00268	pleiotropic drug resistance ABC transporter	590	0	71.47	-3.39847	4.73757	4.36536	0.0366768
LE01Gene13611	---NA---	146			-3.39847	4.73757	4.36536	0.0366768
LE01Gene04335	hypothetical protein LENED_001790	243	3.02e-170	56.65	-3.39847	4.73757	4.36536	0.0366768
LE01Gene04532	APC amino acid permease	317	3.3e-168	70.35	-3.39847	4.73757	4.36536	0.0366768
LE01Gene04604	tubulin-folding cofactor b	231	6.41e-166	83.89	-3.39847	4.73757	4.36536	0.0366768
LE01Gene04829	carbohydrate-binding module family 1 protein	521	0	83.11	-3.39847	4.73757	4.36536	0.0366768
LE01Gene00695	nucleolar complex-associated protein 3	792	0	74.47	-3.39847	4.73757	4.36536	0.0366768
LE01Gene14617	predicted protein	510	3.97e-163	65.03	-3.39847	4.73757	4.36536	0.0366768
LE01Gene00514	heavy metal translocatin	943	0	59.63	-3.39847	4.73757	4.36536	0.0366768
LE01Gene04278	predicted protein	770	0	61.23	-2.07797	5.43533	4.28428	0.0384665
LE01Gene01665	ARM repeat-containing protein	1016	0	66.41	-2.15846	5.05967	3.84169	0.049993
LE01Gene11341	predicted protein	220	3.99e-158	73.03	-2.15846	5.05967	3.84169	0.049993
LE01Gene11740	---NA---	224			-2.15846	5.05967	3.84169	0.049993
LE01Gene10024	6,7-dimetjyl-8-ribityllumazine synthase	207	2.07e-150	85.82	-2.15846	5.05977	3.84169	0.0499932
LE01Gene10086	BRO1-domain-containing protein	826	0	71.27	-2.15845	5.06003	3.84167	0.0499938
LE01Gene05925	---NA---	315			-2.15845	5.05889	3.84163	0.049995
LE01Gene07246	sec7 domain protein	1310	0	62.8	-2.15845	5.05889	3.84163	0.049995
LE01Gene10271	predicted protein	531	0	52.96	-2.15845	5.05889	3.84163	0.049995
LE01Gene00298	rad51-associated protein brh2	994	0	58.75	-2.15845	5.05889	3.84163	0.049995
LE01Gene04403	general substrate transporter	468	0	66.25	-2.15845	5.05889	3.84163	0.049995
LE01Gene00696	hypothetical protein LENED_004045	290	3.62e-160	60.28	-2.15845	5.05889	3.84163	0.049995
LE01Gene08740	HD-domain/PDEase-like protein	409	0	61.96	-2.15844	5.05899	3.84162	0.0499952
LE01Gene10197	hypothetical protein GYMLUDRAFT_91020	384	0	90.66	-2.15844	5.05899	3.84162	0.0499952
LE01Gene03338	glycoside hydrolase family 61 protein	362	0	70.49	-2.15844	5.05899	3.84162	0.0499952
LE01Gene03002	tryptophan synthase beta subunit-like PLP-dependent enzyme	525	0	85.04	-2.15844	5.05899	3.84162	0.0499952
LE01Gene04103	WD40 repeat-like protein	352	0	83.02	-2.15844	5.05899	3.84162	0.0499952
LE01Gene13903	hypothetical protein LENED_011096	976	0	58.31	-2.15844	5.05899	3.84162	0.0499952
LE01Gene00592	predicted protein	692	0	49.35	-2.15844	5.05899	3.84162	0.0499952
LE01Gene11474	acyl-CoA N-acyltransferase	180	7.35e-132	68.69	-2.15844	5.05924	3.8416	0.0499958
LE01Gene11760	hypothetical protein LENED_001182	260	3.74e-128	73.89	-2.15844	5.05924	3.8416	0.0499958
LE01Gene04082	signal recognition particle protein	319	0	75.85	-2.15844	5.05924	3.8416	0.0499958
LE01Gene00946	glycoside hydrolase family 79 protein	590	0	81.8	-2.15844	5.05924	3.8416	0.0499958
