# Supplementary material
Source: MDPI journal article supplement (https://www.mdpi.com/2076-3417/11/15/6997)
Supplement: s1 [file s1 › Table S4.xlsx]

## Sheet: Sheet1
Table S4. The list of the differentially expressed genes enriched in GSEA analysis
GO ID	GO annotation	ES	NES	NOM p-val	FDR q-val	FWER p-val	SIZE	Gene ID
GO:0035822	gene conversion	0.777106	1.53161	0	0.247681	0.96	14	LE01Gene00643,LE01Gene00799,LE01Gene00857,LE01Gene02271,LE01Gene10312,LE01Gene05316,LE01Gene01160,LE01Gene00925,LE01Gene01563,LE01Gene03287,LE01Gene07785,LE01Gene11009,LE01Gene04172
GO:0000726	non-recombinational repair	0.754225	1.94777	0	0	0	15	LE01Gene02111,LE01Gene02271,LE01Gene10312,LE01Gene04483,LE01Gene06562,LE01Gene13786,LE01Gene05316,LE01Gene12906,LE01Gene07785,LE01Gene05877,LE01Gene08672,LE01Gene03326,LE01Gene04172,LE01Gene06943,LE01Gene05682
GO:0003712	transcription coregulator activity	0.621475	1.52484	0.0011976	0.240004	0.96	28	LE01Gene07483,LE01Gene00651,LE01Gene00825,LE01Gene10322,LE01Gene06343,LE01Gene11098,LE01Gene04483,LE01Gene08061,LE01Gene08059,LE01Gene10688,LE01Gene13326,LE01Gene06382,LE01Gene04077,LE01Gene03364,LE01Gene01441,LE01Gene01555,LE01Gene07328,LE01Gene07795,LE01Gene11625,LE01Gene06156,LE01Gene05577,LE01Gene08612,LE01Gene05392,LE01Gene07664,LE01Gene11009,LE01Gene04209,LE01Gene08923,LE01Gene12447
GO:1990391	DNA repair complex	0.61436	1.55841	0	0.201969	0.92	22	LE01Gene00643,LE01Gene00656,LE01Gene06820,LE01Gene02689,LE01Gene00728,LE01Gene07301,LE01Gene02271,LE01Gene02281,LE01Gene01962,LE01Gene01952,LE01Gene10695,LE01Gene05316,LE01Gene01108,LE01Gene06840,LE01Gene01563,LE01Gene03287,LE01Gene01581,LE01Gene07333,LE01Gene11678,LE01Gene06164,LE01Gene11754,LE01Gene12460
GO:0044798	nuclear transcription factor complex	0.604715	1.73474	0	0.042859	0.28	38	LE01Gene00651,LE01Gene02689,LE01Gene11876,LE01Gene00728,LE01Gene10643,LE01Gene07230,LE01Gene02281,LE01Gene01962,LE01Gene01952,LE01Gene11098,LE01Gene05040,LE01Gene03247,LE01Gene03248,LE01Gene08061,LE01Gene14554,LE01Gene12916,LE01Gene00520,LE01Gene12704,LE01Gene07170,LE01Gene04076,LE01Gene04077,LE01Gene03388,LE01Gene03877,LE01Gene05073,LE01Gene01555,LE01Gene01632,LE01Gene11640,LE01Gene02823,LE01Gen…
GO:0005667	transcription factor complex	0.598078	1.74454	0.00119617	0.0621388	0.24	40	LE01Gene00651,LE01Gene02689,LE01Gene11876,LE01Gene00728,LE01Gene10643,LE01Gene07230,LE01Gene02281,LE01Gene01962,LE01Gene01952,LE01Gene11098,LE01Gene05040,LE01Gene03247,LE01Gene03248,LE01Gene06584,LE01Gene08061,LE01Gene14554,LE01Gene12916,LE01Gene00520,LE01Gene12704,LE01Gene07170,LE01Gene04076,LE01Gene04077,LE01Gene03388,LE01Gene03877,LE01Gene05073,LE01Gene01555,LE01Gene01632,LE01Gene07747,LE01Gen…
GO:0006303	double-strand break repair via nonhomologous end joining	0.55468	1.73719	0.0011655	0.0535738	0.28	13	LE01Gene02111,LE01Gene10312,LE01Gene04483,LE01Gene06562,LE01Gene13786,LE01Gene12906,LE01Gene07785,LE01Gene05877,LE01Gene08672,LE01Gene03326,LE01Gene04172,LE01Gene06943,LE01Gene05682
GO:0000436	carbon catabolite activation of transcription from RNA polymerase II promoter	0.527708	1.57723	0.00357143	0.192767	0.92	28	LE01Gene06809,LE01Gene02964,LE01Gene00803,LE01Gene02264,LE01Gene01958,LE01Gene01942,LE01Gene10300,LE01Gene04950,LE01Gene06966,LE01Gene13917,LE01Gene08147,LE01Gene11717,LE01Gene11168,LE01Gene08734,LE01Gene07170,LE01Gene03698,LE01Gene02602,LE01Gene11431,LE01Gene03897,LE01Gene01383,LE01Gene08457,LE01Gene05844,LE01Gene02987,LE01Gene08519,LE01Gene05415,LE01Gene07698,LE01Gene09820,LE01Gene11762
GO:0097435	supramolecular fiber organization	-0.732825	-1.54944	0	0.164897	0.72	59	LE01Gene00661,LE01Gene00697,LE01Gene00757,LE01Gene02366,LE01Gene07157,LE01Gene02018,LE01Gene01978,LE01Gene04975,LE01Gene03419,LE01Gene12493,LE01Gene06968,LE01Gene07084,LE01Gene05334,LE01Gene08622,LE01Gene05308,LE01Gene05319,LE01Gene11172,LE01Gene09620,LE01Gene04272,LE01Gene04241,LE01Gene04227,LE01Gene13953,LE01Gene12611,LE01Gene12531,LE01Gene10151,LE01Gene07165,LE01Gene00755,LE01Gene09701,LE01Gen…
GO:0022604	regulation of cell morphogenesis	-0.783399	-1.52035	0.00236407	0.180424	0.88	45	LE01Gene00697,LE01Gene00755,LE01Gene00889,LE01Gene11811,LE01Gene02140,LE01Gene02159,LE01Gene11096,LE01Gene04975,LE01Gene13563,LE01Gene08045,LE01Gene13578,LE01Gene08622,LE01Gene12109,LE01Gene11172,LE01Gene09620,LE01Gene04272,LE01Gene00527,LE01Gene13143,LE01Gene01278,LE01Gene10085,LE01Gene00920,LE01Gene05264,LE01Gene09650,LE01Gene01434,LE01Gene01435,LE01Gene01442,LE01Gene01591,LE01Gene01607,LE01Gen…
GO:2000769	regulation of establishment or maintenance of cell polarity regulating cell shape	-0.784095	-1.52076	0.0037037	0.188632	0.88	14	LE01Gene11096,LE01Gene13563,LE01Gene08045,LE01Gene12109,LE01Gene00920,LE01Gene09650,LE01Gene01442,LE01Gene01607,LE01Gene07799,LE01Gene06160,LE01Gene05501,LE01Gene10928,LE01Gene08924,LE01Gene08931
GO:0008360	regulation of cell shape	-0.805486	-1.57107	0.00466744	0.144135	0.64	44	LE01Gene00697,LE01Gene00755,LE01Gene00889,LE01Gene11811,LE01Gene02140,LE01Gene02159,LE01Gene11096,LE01Gene04975,LE01Gene13563,LE01Gene08045,LE01Gene13578,LE01Gene08622,LE01Gene12109,LE01Gene11172,LE01Gene09620,LE01Gene04272,LE01Gene00527,LE01Gene13143,LE01Gene01278,LE01Gene00920,LE01Gene05264,LE01Gene09650,LE01Gene01434,LE01Gene01435,LE01Gene01442,LE01Gene01591,LE01Gene01607,LE01Gene01050,LE01Gen…
GO:0007114	cell budding	-0.828534	-1.50237	0.00350877	0.222365	0.96	17	LE01Gene00697,LE01Gene06768,LE01Gene00757,LE01Gene07157,LE01Gene03232,LE01Gene05334,LE01Gene08622,LE01Gene10151,LE01Gene01434,LE01Gene01435,LE01Gene01591,LE01Gene01050,LE01Gene05959,LE01Gene05383,LE01Gene02462,LE01Gene02417,LE01Gene12446
GO:0045926	negative regulation of growth	-0.843953	-1.49453	0.00966184	0.215098	0.96	22	LE01Gene00626,LE01Gene08969,LE01Gene00733,LE01Gene00803,LE01Gene07269,LE01Gene07247,LE01Gene10300,LE01Gene04968,LE01Gene05333,LE01Gene11918,LE01Gene11265,LE01Gene04058,LE01Gene11420,LE01Gene13730,LE01Gene01382,LE01Gene01462,LE01Gene09137,LE01Gene05403,LE01Gene05404,LE01Gene13236,LE01Gene10956,LE01Gene12982
GO:0046785	microtubule polymerization	-0.846126	-1.50201	0.00928074	0.198614	0.96	16	LE01Gene00697,LE01Gene07157,LE01Gene03419,LE01Gene05319,LE01Gene10151,LE01Gene07165,LE01Gene00755,LE01Gene01434,LE01Gene01435,LE01Gene01591,LE01Gene05959,LE01Gene00757,LE01Gene05383,LE01Gene02462,LE01Gene02417,LE01Gene12446
GO:0071963	establishment or maintenance of cell polarity regulating cell shape	-0.846787	-1.68283	0.00320171	0.013707	0.04	23	LE01Gene00697,LE01Gene00755,LE01Gene02140,LE01Gene04975,LE01Gene08045,LE01Gene08622,LE01Gene09620,LE01Gene04272,LE01Gene13143,LE01Gene00920,LE01Gene01434,LE01Gene01435,LE01Gene01591,LE01Gene01050,LE01Gene04693,LE01Gene07799,LE01Gene06160,LE01Gene00757,LE01Gene05501,LE01Gene04214,LE01Gene04207,LE01Gene02398,LE01Gene02396
GO:0072697	protein localization to cell cortex	-0.866524	-1.51442	0.0104167	0.18219	0.88	16	LE01Gene02140,LE01Gene04975,LE01Gene03476,LE01Gene05333,LE01Gene12109,LE01Gene00920,LE01Gene00755,LE01Gene06832,LE01Gene13730,LE01Gene01653,LE01Gene06160,LE01Gene00757,LE01Gene02897,LE01Gene02447,LE01Gene02398,LE01Gene02396
GO:0097747	RNA polymerase activity	-0.866569	-1.55292	0.0144928	0.164828	0.72	9	LE01Gene12825,LE01Gene07122,LE01Gene02111,LE01Gene06341,LE01Gene06448,LE01Gene06467,LE01Gene10966,LE01Gene05394,LE01Gene07689
GO:0031122	cytoplasmic microtubule organization	-0.869489	-1.52431	0.0155502	0.209971	0.84	12	LE01Gene00697,LE01Gene04975,LE01Gene08622,LE01Gene07165,LE01Gene01434,LE01Gene01435,LE01Gene01591,LE01Gene09130,LE01Gene04693,LE01Gene05383,LE01Gene05437,LE01Gene12446
GO:0005200	structural constituent of cytoskeleton	-0.870541	-1.50215	0.0200753	0.208468	0.96	17	LE01Gene00697,LE01Gene06768,LE01Gene00757,LE01Gene07157,LE01Gene03232,LE01Gene05334,LE01Gene08622,LE01Gene10151,LE01Gene01434,LE01Gene01435,LE01Gene01591,LE01Gene01050,LE01Gene05959,LE01Gene05383,LE01Gene02462,LE01Gene02417,LE01Gene12446
GO:0060258	negative regulation of filamentous growth	-0.879627	-1.59429	0.00425985	0.133816	0.44	21	LE01Gene00626,LE01Gene08969,LE01Gene00803,LE01Gene07269,LE01Gene07247,LE01Gene10300,LE01Gene04968,LE01Gene05333,LE01Gene11918,LE01Gene11265,LE01Gene04058,LE01Gene11420,LE01Gene13730,LE01Gene01382,LE01Gene01462,LE01Gene09137,LE01Gene05403,LE01Gene05404,LE01Gene13236,LE01Gene10956,LE01Gene12982
GO:1900429	negative regulation of filamentous growth of a population of unicellular organisms	-0.879629	-1.59196	0.00437637	0.107053	0.44	20	LE01Gene00626,LE01Gene08969,LE01Gene07269,LE01Gene07247,LE01Gene10300,LE01Gene04968,LE01Gene05333,LE01Gene11918,LE01Gene11265,LE01Gene04058,LE01Gene11420,LE01Gene13730,LE01Gene01382,LE01Gene01462,LE01Gene09137,LE01Gene05403,LE01Gene05404,LE01Gene13236,LE01Gene10956,LE01Gene12982,
GO:0005852	eukaryotic translation initiation factor 3 complex	-0.879793	-1.54158	0.00766703	0.173925	0.76	12	LE01Gene14343,LE01Gene07258,LE01Gene03461,LE01Gene03434,LE01Gene04876,LE01Gene10545,LE01Gene01275,LE01Gene04764,LE01Gene09672,LE01Gene09572,LE01Gene05488,LE01Gene07642
