# Supplementary material
Source: MDPI journal article supplement (https://www.mdpi.com/2076-3417/11/15/6997)
Supplement: s1 [file s1 › Table S5.xlsx]

## Sheet: Sheet1
Table S5. The list of the differentially expressed genes related in carbohydrate-active enzymes (CAZyme) family, lignocellulose, and transcription factors. l
	Gene ID	Gene Name	logFC	logCPM	LR	PValue
CAZyme	LE01Gene00318	GT22	5.69766	2.1123	9.41884	0.00214767
	LE01Gene00561	GT1	5.13463	2.87361	7.82211	0.00516108
	LE01Gene00748	GT15	4.74092	3.70344	5.98591	0.0144206
	LE01Gene01433	CE10	4.6475	3.32987	4.43354	0.0352394
	LE01Gene02558	CE10	5.06346	4.62929	11.1586	0.000836453
	LE01Gene03808	CE10	4.64723	3.3201	4.41279	0.0356704
	LE01Gene04239	GH71	5.20091	2.10279	5.29059	0.021441
	LE01Gene06071	GH17	4.74092	3.70344	5.98591	0.0144206
	LE01Gene06170	GH3	5.06348	2.6883	6.37236	0.0115911
	LE01Gene06300	GH1	4.64678	3.30327	4.37714	0.0364241
	LE01Gene07491	GH3	6.33309	2.84881	27.0148	2.02e-07
	LE01Gene07497	AA14	5.69808	2.57389	12.8388	0.0003395
	LE01Gene08330	AA1_1	4.64733	3.32364	4.42038	0.0355122
	LE01Gene08723	AA2	4.74102	3.70576	5.99272	0.014365
	LE01Gene09425	AA3_2	4.7403	3.68837	5.94224	0.0147822
	LE01Gene10634	GH3	4.64723	3.3201	4.41279	0.0356704
	LE01Gene00046	AA7	-3.41438	4.73836	4.40254	0.0358854
	LE01Gene00946	GH79	-2.15844	5.05924	3.8416	0.0499958
	LE01Gene02921	GT15	-2.31041	5.54376	7.68149	0.00557899
	LE01Gene03338	AA9	-2.15844	5.05899	3.84162	0.0499952
	LE01Gene04829	GH7	-3.39847	4.73757	4.36536	0.0366768
	LE01Gene05153	GT25	-2.3409	5.12936	4.75374	0.0292347
	LE01Gene05323	GH27	-2.22553	5.82285	9.72616	0.00181664
	LE01Gene07201	GH76	-2.34121	5.1304	4.74035	0.029463
	LE01Gene07751	CE10	-4.15611	4.98467	8.25032	0.00407449
	LE01Gene11296	GH154	-2.0949	5.43636	5.898	0.0151581
Lignocellulose	LE01Gene06170	β-glucosidase	5.06348	2.6883	6.37236	0.0115911
	LE01Gene06300	β-glucosidase	4.64678	3.30327	4.37714	0.0364241
	LE01Gene07491	β-glucosidase	6.33309	2.84881	27.0148	2.02e-07
	LE01Gene08330	multicopper oxidase	4.64733	3.32364	4.42038	0.0355122
	LE01Gene09425	glucose oxidase	4.7403	3.68837	5.94224	0.0147822
	LE01Gene10634	β-glucosidase	4.64723	3.3201	4.41279	0.0356704
	LE01Gene04829	1,4-β-cellobiosidase	-3.39847	4.73757	4.36536	0.0366768
	LE01Gene03338	Endo-beta-1,4-glucanase	-2.15844	5.05899	3.84162	0.0499952
Transcription Factor	LE01Gene05969	Fungal specific transcription factor	4.82834	3.99706	8.0798	0.00447614
	LE01Gene07732	C2H2-zf transcription factor	4.91104	2.22981	3.85715	0.0495344
	LE01Gene01730	C2H2-zf transcription factor	4.64733	3.32364	4.42038	0.0355122
	LE01Gene09749	C2H2-zf transcription factor	4.8286	3.99713	8.08009	0.00447543
	LE01Gene09820	CBFD_NFYB_HMF transcription factor	4.91083	4.22269	7.00367	0.00813429
	LE01Gene11168	C2H2-zf transcription factor	4.91086	4.22751	7.6729	0.00560564
	LE01Gene11531	C2H2-zf transcription factor	4.6475	3.32987	4.43354	0.0352394
	LE01Gene11538	C2H2-zf transcription factor	5.13496	4.80472	14.3734	0.000149905
	LE01Gene13269	AT_hook transcription factor	5.99252	2.29424	14.4073	0.000147227
	LE01Gene04288	HMG_box transcription factor	5.20136	2.10279	5.29058	0.0214411
	LE01Gene11386	C2H2-zf transcription factor	-2.34095	5.12927	4.75697	0.0291798
	LE01Gene03510	C2H2-zf transcription factor	-2.33998	5.12848	4.71549	0.0298921
	LE01Gene08925	C2H2-zf transcription factor	-3.39847	4.73757	4.36536	0.0366768
