# Supplementary material
Source: MDPI journal article supplement (https://www.mdpi.com/2076-3417/11/15/6997)

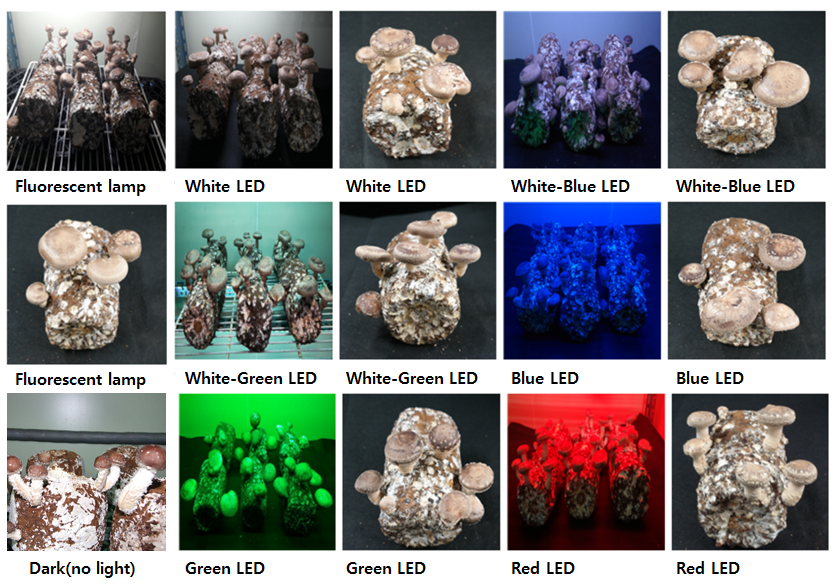

Supplement: s1 [file s1 › Fig. S1.tif]

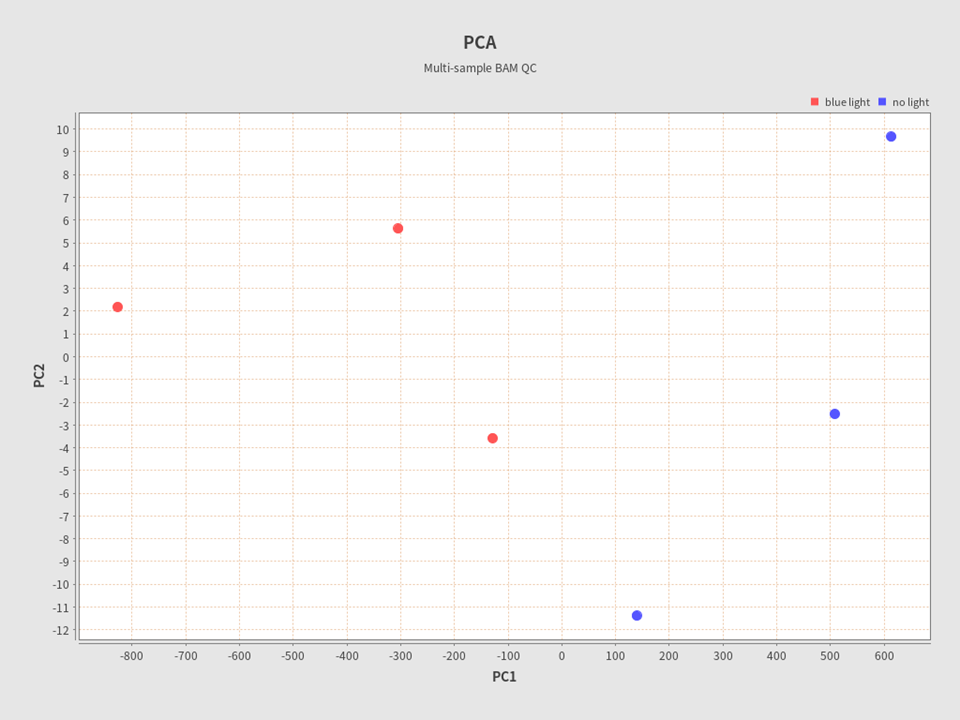

Supplement: s1 [file s1 › Fig. S2.tif]
